# Supplementary material for: Earthquake-enhanced dissolved carbon cycles in ultra-deep ocean sediments
Source: Springer Nature journal article supplement (doi:10.1038/s41467-023-41116-w), 2023-09-11
Supplement: MOESM1 [file 41467_2023_41116_MOESM1_ESM.pdf]

## *Supplementary Information for*

### **Earthquake-enhanced dissolved carbon cycles in ultra-deep ocean sediments**

Mengfan Chu<sup>1</sup>, Rui Bao<sup>1\*</sup>, Michael Strasser<sup>2</sup>, Ken Ikehara<sup>3</sup>, Jez Everest<sup>4</sup>, Lena Maeda<sup>5</sup>, Katharina Hochmuth<sup>6,7</sup>, Li Xu<sup>8</sup>, Ann McNichol<sup>9</sup>, Piero Bellanova<sup>10</sup>, Troy Rasbury<sup>11</sup>, Martin Koelling<sup>12</sup>, Natascha Riedinger<sup>13</sup>, Joel Johnson<sup>14</sup>, Min Luo<sup>15</sup>, Christian März<sup>16,17</sup>, Susanne Straub<sup>18</sup>, Kana Jitsuno<sup>19</sup>, Morgane Brunet<sup>20</sup>, Zhirong Cai<sup>21</sup>, Antonio Cattaneo<sup>22</sup>, Kanhsi Hsiung<sup>23</sup>, Takashi Ishizawa<sup>24</sup>, Takuya Itaki<sup>3</sup>, Toshiya Kanamatsu<sup>25</sup>, Myra Keep<sup>26</sup>, Arata Kioka<sup>27</sup>, Cecilia McHugh<sup>28</sup>, Aaron Micallef<sup>29</sup>, Dhananjai Pandey<sup>30</sup>, Jean Noël Proust<sup>20</sup>, Yasufumi Satoguchi<sup>31</sup>, Derek Sawyer<sup>32</sup>, Chloé Seibert<sup>33</sup>, Maxwell Silver<sup>34</sup>, Joonas Virtasalo<sup>35</sup>, Yonghong Wang<sup>36</sup>, Ting-Wei Wu<sup>12,37</sup>, Sarah Zellers<sup>38</sup>

<sup>1</sup> Frontiers Science Center for Deep Ocean Multispheres and Earth System, and Key Laboratory of Marine Chemistry Theory and Technology, Ministry of Education, Ocean University of China; Qingdao, 266100, China.

<sup>2</sup> University of Innsbruck, Institute of Geology; Innsbruck, Austria.

<sup>3</sup> National Institute of Advanced Industrial Science and Technology (AIST), Geological Survey of Japan, Institute of Geology and Geoinformation; Ibaraki, 305-8567, Japan.

<sup>4</sup> British Geological Survey, Lyell Centre; Edinburgh EH14 4AP, UK.

<sup>5</sup> Center for Deep Earth Exploration, Japan Agency for Marine-Earth Science and Technology; Kanagawa, 236-0001, Japan.

<sup>6</sup> School of Geography, Geology and the Environment, University of Leicester, Leicester, UK.

<sup>7</sup> Australian Centre for Excellence in Antarctic Sciences, Institute for Marine and Antarctic Studies, University of Tasmania, 20 Castray Esplanade, Battery Point TAS 7004, Australia.

<sup>8</sup> NOSAMS Laboratory, Woods Hole Oceanographic Institution; Massachusetts, USA.

<sup>9</sup> Department of Geology and Geophysics, Woods Hole Oceanographic Institution; Massachusetts, USA.

<sup>10</sup> RWTH Aachen University, Institute of Neotectonics and Natural Hazards & Institute of Geology and Geochemistry of Petroleum and Coal; 52056 Aachen, Germany.

- <sup>11</sup> Stony Brook University, Department of Geosciences; New York, 11794, USA.
- <sup>12</sup> MARUM – Center for Marine Environmental Science, University of Bremen; Bremen, 28359, Germany.
- <sup>13</sup> Boone Pickens School of Geology, Oklahoma State University; Oklahoma 74078, USA.
- <sup>14</sup> University of New Hampshire, Department of Earth Sciences; New Hampshire, 03824, USA.
- <sup>15</sup> Shanghai Engineering Research Center of Hadal Science and Technology, College of Marine Sciences, Shanghai Ocean University; Shanghai, China.
- <sup>16</sup> School of Earth and Environment, University of Leeds; Leeds, LS2 9JT, UK.
- <sup>17</sup> Institute for Geosciences, University of Bonn, Nussallee 8, 53115 Bonn, Germany.
- <sup>18</sup> Lamont Doherty Earth Observatory, Geochemistry Division; New York, 10964, USA.
- <sup>19</sup> Department of Life Science and Medical Bioscience, Waseda University; Tokyo 162-0041, Japan.
- <sup>20</sup> Univ Rennes, CNRS, Géosciences Rennes, UMR 6118, 35000 Rennes, France.
- <sup>21</sup> Kyoto University, Department of Geology and Mineralogy, Division of Earth and Planetary Sciences, Graduate School of Science; Kyoto, 606-8502, Japan.
- <sup>22</sup> Geo-Ocean, UMR 6538, Univ Brest, CNRS, Ifremer; Plouzané, F-29280, France.
- <sup>23</sup> Research Institute for Marine Geodynamics, JAMSTEC, Marine Geology and Geophysics Research Group, Subduction Dynamics Research Center; Kanagawa, 237-0061, Japan.
- <sup>24</sup> International Research Institute of Disaster Science, Tohoku University, Sendai, 980-0845, Japan.
- <sup>25</sup> Japan Agency for Marine-Earth Science and Technology (JAMSTEC), Research Institute of Marine Geodynamics (IMG); Yokosuka 237-0061, Japan.
- <sup>26</sup> The University of Western Australia, Department School of Earth Sciences; Perth, Australia.
- <sup>27</sup> Kyushu University, Department of Earth Resources Engineering; Fukuoka 819-0395, Japan.
- <sup>28</sup> Queens College, City University of New York, School of Earth and Environmental Sciences; New York, 11367, USA.
- <sup>29</sup> GEOMAR Helmholtz Centre for Ocean Research Kiel; Kiel D-24148, Germany.
- <sup>30</sup> National Centre for Polar and Ocean Research, Ministry of Earth Sciences, Government of India; Goa 403 804, India.

<sup>31</sup> Lake Biwa Museum; Shiga 525-0001, Japan.

<sup>32</sup> The Ohio State University, School of Earth Sciences; Ohio, 43210, USA.

<sup>33</sup> Lamont Doherty Earth Observatory, Marine geology and geophysics division, New York, 10964, USA.

<sup>34</sup> Colorado School of Mines, Hydrologic Science and Engineering; Colorado, 80227, USA.

<sup>35</sup> Geological Survey of Finland (GTK); Espoo, 02151, Finland.

<sup>36</sup> Ocean University of China, Department of Marine Geosciences; Qingdao, 266100, China.

<sup>37</sup> Norwegian Geotechnical Institute, Oslo, Norway.

<sup>38</sup> University of Central Missouri, Department of Physical Sciences; Missouri 64093, USA.

\*Corresponding author. Email: baorui@ouc.edu.cn

## **Supplementary Text 1. Sources of the dissolved carbon in the Japan Trench sediments.**

The carbon isotopic signatures of interstitial water (IW) dissolved organic and inorganic carbon (DOC, DIC) in the Japan Trench are informative of their sources. The  $\Delta^{14}\text{C}$  values of the near-surface IW at Sites M0081, M0083 and M0084 are significantly higher than the bottom water (BW) DOC in the Japan Trench and in the Mariana Trench<sup>1</sup> (Supplementary Fig. 1), thus excluding the BW as the major IW DOC source. On the other hand, the trench SOC is potentially composed of sinking particulate organic carbon (POC) and earthquake-introduced sedimentary organic carbon (SOC). The IW DOC in the Japan Trench is also clearly distinguished from the POC in the Japan Trench and the Mariana Trench<sup>1,2</sup> (Supplementary Fig. 1). The IW dissolved carbon is therefore mainly produced from the remineralization of earthquake-introduced SOC.

Earthquakes introduce significant amount of SOC with various provenances into the Japan Trench<sup>3,4</sup>. While both terrestrial<sup>4</sup> and marine<sup>3</sup> SOC are proposed to be dominant in turbidite deposits in the Japan Trench, the  $^{13}\text{C}$  signatures of the DOC pool reveal its marine origin. Typical  $\delta^{13}\text{C}$  values for the OC reservoirs include  $-25\text{‰}$  for terrestrial biogenic OC,  $-20\text{‰}$  for marine biogenic OC,  $1\text{‰}$  for biogenic carbonates and  $-29\text{‰}$  for fossil OC<sup>5</sup>. The DOC in the Japan Trench is therefore mainly produced from the marine-sourced SOC, which can result from either selective degradation or dominance of marine-sourced OC in the SOC pool. In addition, the relatively low  $\Delta^{14}\text{C}$  values (Supplementary Fig. 1) indicate that the source SOC pool is dominated by earthquake-remobilized pre-aged OC<sup>4</sup>.

OC degradation and anaerobic oxidation of methane are two processes observed at the sulfate-methane transition zone (SMTZ)<sup>6,7</sup>. OC degradation typically produces  $^{13}\text{C}$ -enriched DIC ( $\sim -9\text{‰}$ ), and anaerobic oxidation of methane produces  $^{13}\text{C}$ -depleted DIC ( $\sim -24\text{‰}$ )<sup>7,8</sup>. The  $^{13}\text{C}$  signatures ( $-12.6\text{‰}$  to  $-15.6\text{‰}$ , Fig. 2) of the DIC pools in the SMTZ and the variations of IW geochemistry parameters (Supplementary Fig. 3)

indicate that both OC degradation and methane diffusion exert controls on the DIC pool in the Japan Trench.

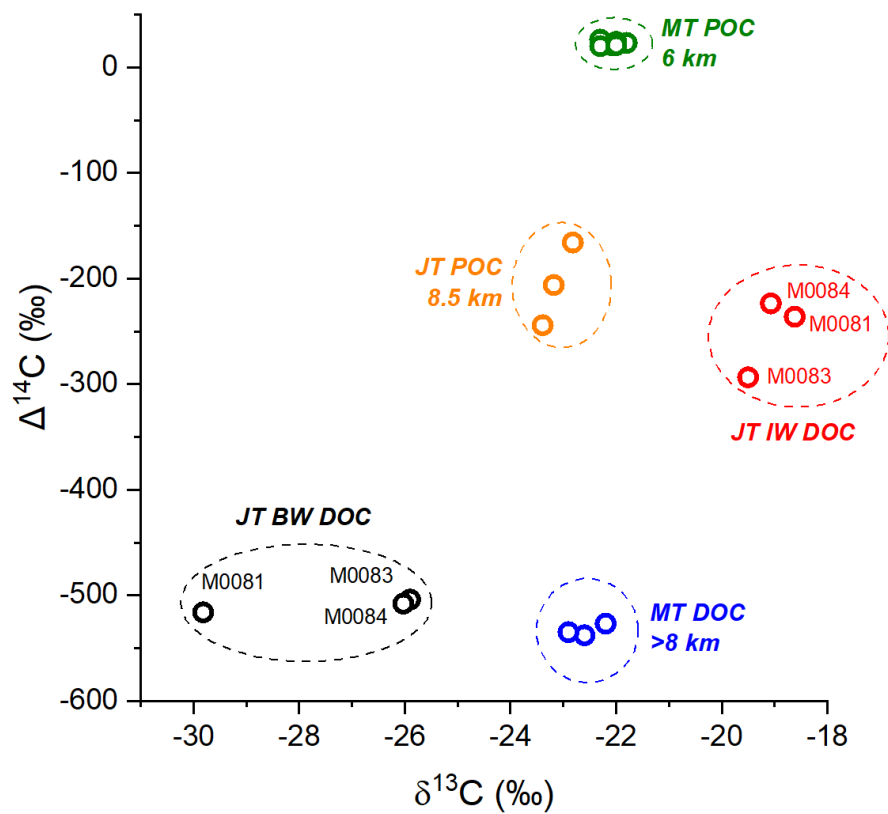

**Supplementary Fig. 1.** Comparisons of the carbon isotopic signatures between the BW DOC (black) and IW DOC (red) in the Japan Trench (JT, this study), the deep-water POC (orange) in the JT<sup>2</sup>, and the deep-water DOC (blue) and POC (green) in the Mariana Trench (MT)<sup>1</sup>.

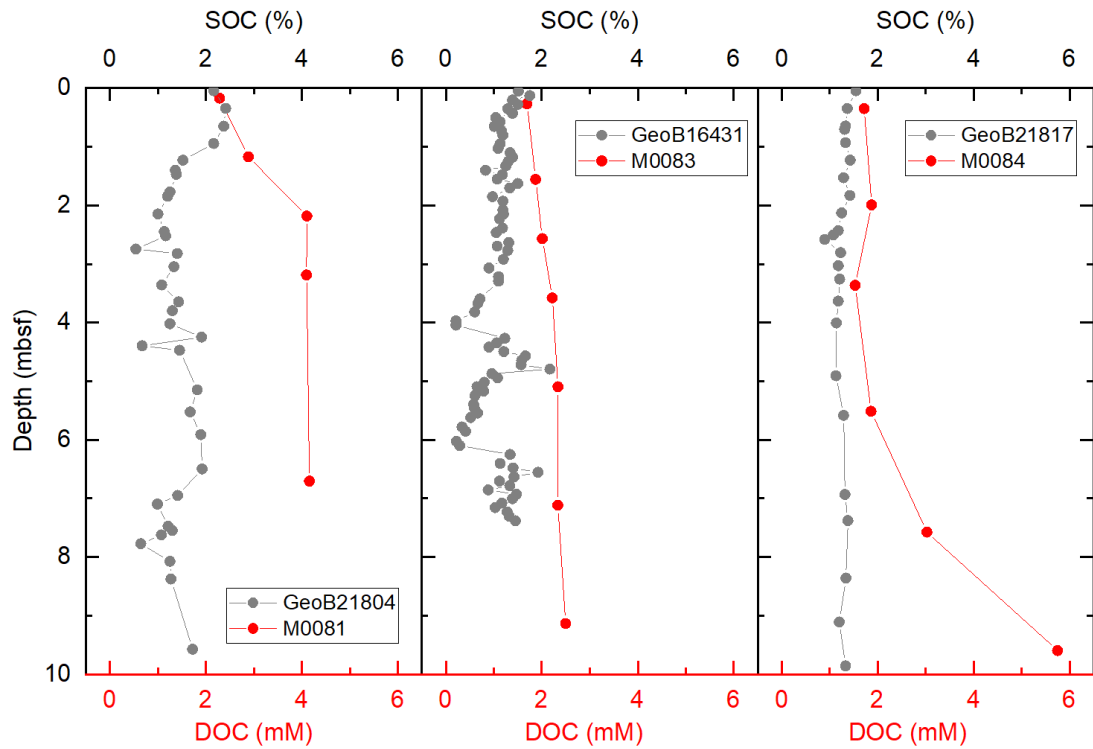

**Supplementary Fig. 2.** Comparisons of SOC and DOC concentrations between the upper 10 m of Sites M0081 (red) and GeoB21804 (grey) (located in the same southern basin), Sites M0083 (red) and GeoB16431 (grey), Sites M0084 (red) and GeoB21817 (grey) (located in the same northern basin). The different vertical variations between SOC and DOC concentrations imply that DOC production is not completely regulated by SOC content. The relatively short cores GeoB21804 and GeoB21817 were collected during R/V Sonne cruise SO251 in 2016, and core GeoB16431 was collected during R/V Sonne cruise SO219 in 2012. The GeoB core data are from refs.<sup>3,4</sup>.

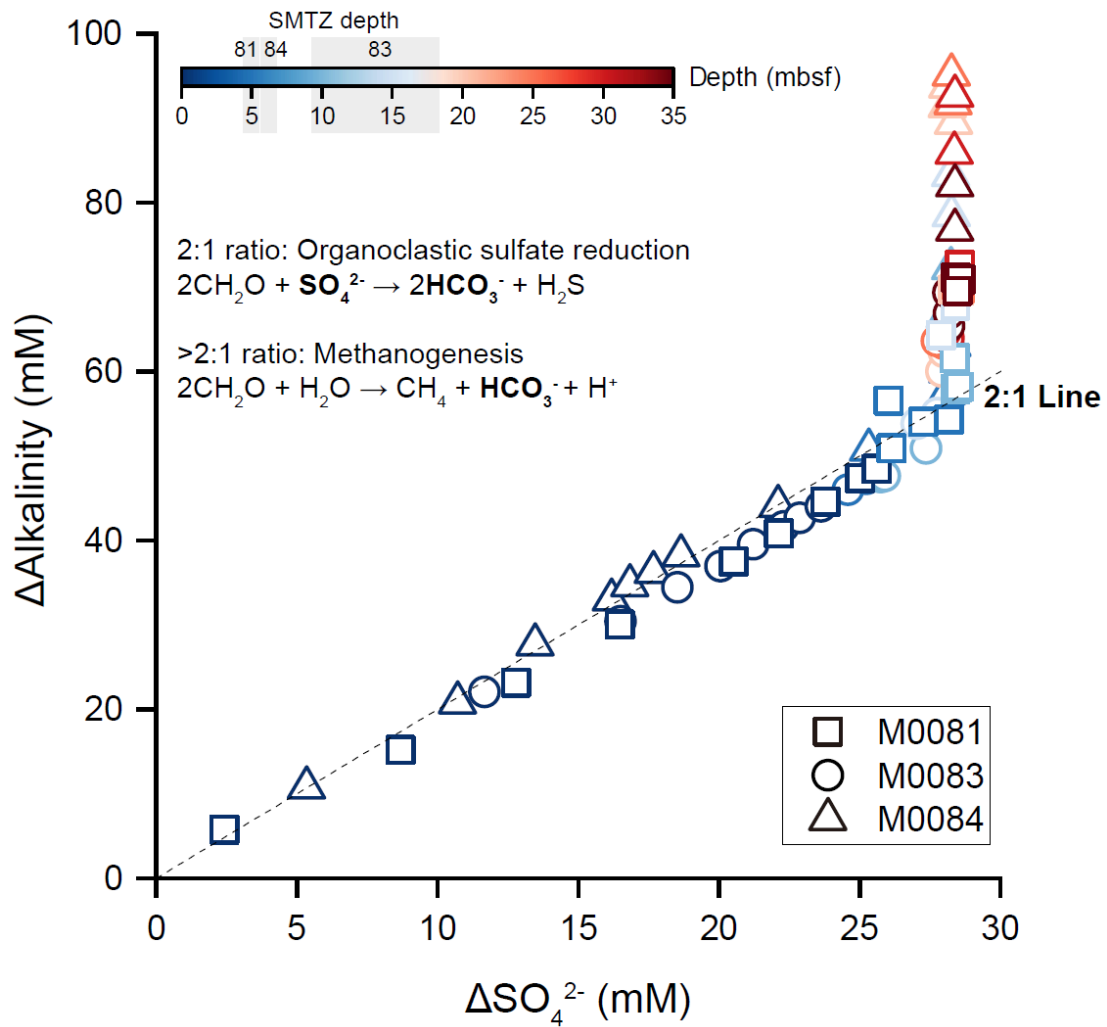

**Supplementary Fig. 3.** The differences of alkalinity and  $\text{SO}_4^{2-}$  concentrations between IW and BW (in absolute values, expressed as  $\Delta\text{Alkalinity}$  and  $\Delta\text{SO}_4^{2-}$ , respectively) at Sites M0081 (square), M0083 (circle) and M0084 (triangle). The SMTZ at each Site is illustrated by gray frames on the depth scale. The ratios of  $\Delta\text{Alkalinity}$  to  $\Delta\text{SO}_4^{2-}$  indicate influences caused by various biogeochemical processes on the IW. For instance, the >2:1 ratio indicates influence from methanogenesis, and the 2:1 ratio indicates influence from organoclastic sulfate reduction (i.e., OC remineralization) on the IW<sup>9</sup>.



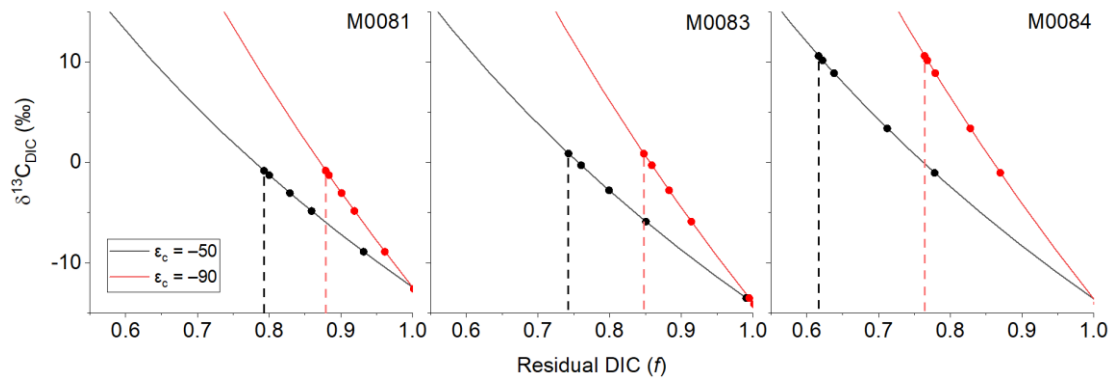

**Supplementary Fig. 4.** Relationships between  $\delta^{13}\text{C}_{\text{DIC}}$  and the residual DIC (expressed as fraction,  $f$  ranges from 0 to 1) from methanogenesis. Both the upper and lower limits of isotope separation factor ( $\epsilon_c$ ) of microbial methanogenesis ( $-50$ ‰, black; and  $-90$ ‰, red)<sup>10</sup> are used. In the deepest IW at Sites M0081, M0083 and M0084, up to 38% (applying  $\epsilon_c = -50$ ‰) or 24% (applying  $\epsilon_c = -90$ ‰) of DIC is converted to methane (Supplementary Table 2).

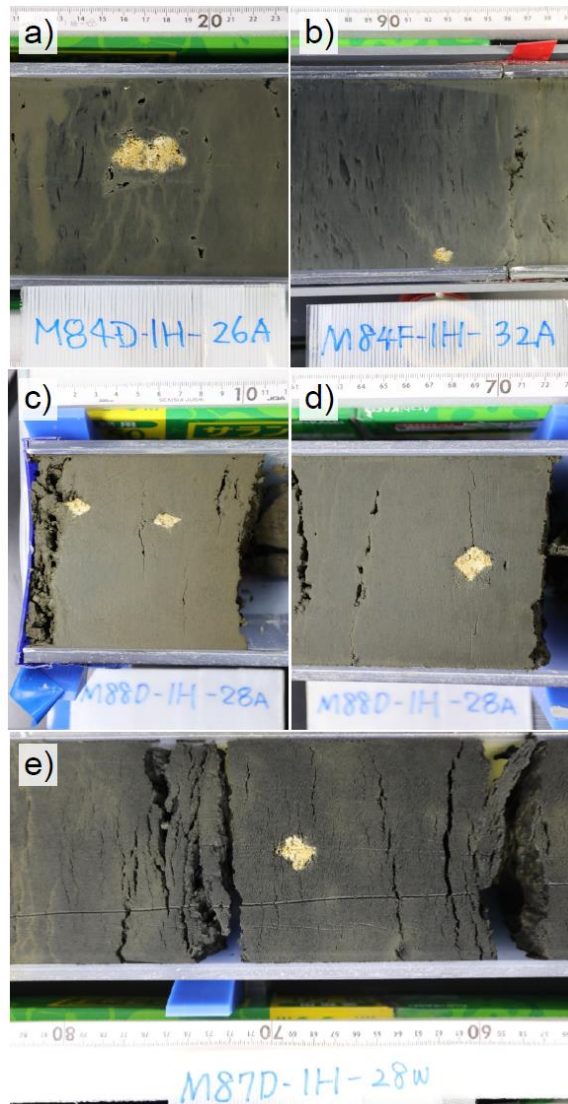

**Supplementary Fig. 5.** The observed authigenic carbonates (ikaites) in Sites M0084 (a & b), M0088 (c & d), and M0087 (e).

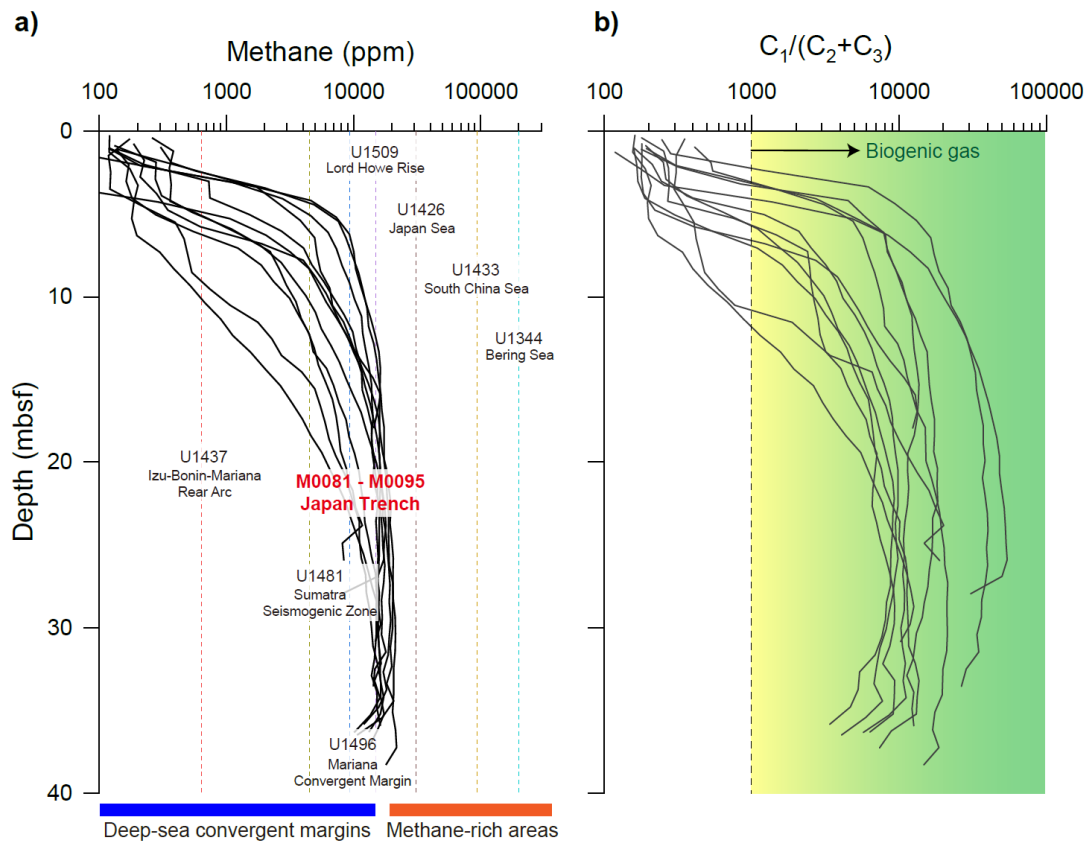

**Supplementary Fig. 6. a,** Headspace methane concentrations and **b,** Ratios of methane to ethane and propane ( $C_1/(C_2 + C_3)$ ) along the Japan Trench. Data are smoothed using adjacent-averaging method with 15 points of window. Dashed lines mark the maximum methane concentrations of the reference IODP Holes (from IODP database: <https://iodp.tamu.edu/>).

**Supplementary Table 1.** Summaries of IODP Holes used for geochemical analyses.

| Site  | Latitude (N) | Longitude (E) | Water depth (m) | Hole for analyses |           |             |
|-------|--------------|---------------|-----------------|-------------------|-----------|-------------|
|       |              |               |                 | IW geochemistry   | Headspace | DOC and DIC |
| M0081 | 36°4.336'    | 142°44.14'    | 8020            | D                 | F         | D           |
| M0082 | 36°6.050'    | 142°45.508'   | 7993            | D                 | D         |             |
| M0083 | 38°45.413'   | 144°7.755'    | 7620            | D                 | D         | D           |
| M0084 | 40°23.726'   | 144°25.328'   | 7590            | D                 | F         | D           |
| M0086 | 39°46.756'   | 144°16.524'   | 7502            | B                 | B         |             |
| M0088 | 40°5.586'    | 144°19.541'   | 7550            | D                 | D         |             |
| M0089 | 38°43.202'   | 144°7.538'    | 7607            | D                 | D         |             |
| M0090 | 38°17.834'   | 144°3.549'    | 7445            | D                 | D         |             |
| M0091 | 37°24.747'   | 143°43.729'   | 7802            | D                 | D         |             |
| M0092 | 36°54.672'   | 143°25.416'   | 7702            | D                 | D         |             |
| M0093 | 39°4.909'    | 144°13.000'   | 7454            | B                 | D         |             |
| M0095 | 36°53.501'   | 143°24.473'   | 7697            | B                 | B         |             |

**Supplementary Table 2.** Estimation of the converted DIC (expressed as fraction,  $f$  ranges from 0 to 1) in the deepest IW at sites M0081, M0083 and M0084.

| Sites | IW depth (mbsf) | $f_{residual}$                |                               | $f_{converted}$               |                               |
|-------|-----------------|-------------------------------|-------------------------------|-------------------------------|-------------------------------|
|       |                 | $\varepsilon_c = -50\text{‰}$ | $\varepsilon_c = -90\text{‰}$ | $\varepsilon_c = -50\text{‰}$ | $\varepsilon_c = -90\text{‰}$ |
| M0081 | 34.345          | 80%                           | 88%                           | 20%                           | 12%                           |
| M0083 | 33.055          | 74%                           | 85%                           | 26%                           | 15%                           |
| M0084 | 27.825          | 62%                           | 76%                           | 38%                           | 24%                           |

**Supplementary Table 3.** IW DOC concentrations of Holes M0081D, M0083D and M0084D.

| Depth (mbsf) | DOC Concentration (mM) | Depth (mbsf) | DOC Concentration (mM) | Depth (mbsf) | DOC Concentration (mM) |
|--------------|------------------------|--------------|------------------------|--------------|------------------------|
|              | <b>M0081D</b>          |              | <b>M0083D</b>          |              | <b>M0084D</b>          |
| 0.175        | 2.285                  | 0.270        | 1.692                  | 0.350        | 1.721                  |
| 1.175        | 2.884                  | 1.560        | 1.871                  | 1.995        | 1.876                  |
| 2.185        | 4.106                  | 2.570        | 2.011                  | 3.365        | 1.531                  |
| 3.190        | 4.097                  | 3.580        | 2.220                  | 5.515        | 1.863                  |
| 6.705        | 4.158                  | 5.095        | 2.337                  | 7.575        | 3.030                  |
| 11.735       | 7.998                  | 7.115        | 2.334                  | 9.595        | 5.751                  |
| 15.850       | 12.138                 | 9.135        | 2.498                  | 11.670       | 6.889                  |
| 17.865       | 11.631                 | 10.145       | 2.462                  | 13.690       | 7.767                  |
| 19.985       | 8.418                  | 12.155       | 2.907                  | 15.715       | 9.859                  |
| 22.085       | 9.284                  | 14.185       | 4.350                  | 17.745       | 7.174                  |
| 24.170       | 12.125                 | 16.230       | 4.640                  | 19.755       | 8.188                  |
| 26.245       | 11.427                 | 18.310       | 5.644                  | 21.775       | 7.260                  |
| 28.290       | 11.997                 | 20.330       | 7.436                  | 23.790       | 7.443                  |
| 30.310       | 7.298                  | 22.480       | 5.545                  | 25.790       | 7.033                  |
| 32.320       | 9.039                  | 24.515       | 5.696                  | 27.825       | 6.847                  |
| 34.345       | 8.197                  | 26.565       | 4.610                  |              |                        |
|              |                        | 28.590       | 4.587                  |              |                        |
|              |                        | 30.975       | 5.476                  |              |                        |
|              |                        | 33.055       | 6.121                  |              |                        |
|              |                        | 35.075       | 6.683                  |              |                        |

**Supplementary Table 4.** IW DIC concentrations of Holes M0081D, M0083D and M0084D.

| <b>Depth (mbsf)</b> | <b>DIC Concentration (mM)</b> | <b>Depth (mbsf)</b> | <b>DIC Concentration (mM)</b> | <b>Depth (mbsf)</b> | <b>DIC Concentration (mM)</b> |
|---------------------|-------------------------------|---------------------|-------------------------------|---------------------|-------------------------------|
|                     | <b>M0081D</b>                 |                     | <b>M0083D</b>                 |                     | <b>M0084D</b>                 |
| 0.175               | 42.20                         | 0.270               | 18.52                         | 1.370               | 22.45                         |
| 2.185               | 30.11                         | 1.560               | 27.66                         | 3.365               | 29.60                         |
| 4.695               | 39.42                         | 2.570               | 30.07                         | 6.565               | 44.75                         |
| 8.720               | 43.60                         | 3.580               | 33.84                         | 11.670              | 46.15                         |
| 15.850              | 42.50                         | 5.095               | 34.95                         | 13.690              | 52.34                         |
| 19.985              | 44.42                         | 7.115               | 26.92                         | 19.755              | 36.23                         |
| 26.245              | 44.56                         | 9.135               | 30.54                         | 23.790              | 35.94                         |
| 30.310              | 49.97                         | 20.330              | 37.41                         | 27.825              | 61.22                         |
| 34.345              | 46.19                         | 24.515              | 43.02                         |                     |                               |
|                     |                               | 28.590              | 46.14                         |                     |                               |
|                     |                               | 33.055              | 49.29                         |                     |                               |

**Supplementary Table 5.** IW  $\delta^{13}\text{C}_{\text{DOC}}$  values of Holes M0081D, M0083D and M0084D.

| Depth (mbsf) | $\delta^{13}\text{C}_{\text{DOC}}$ (‰) | Depth (mbsf) | $\delta^{13}\text{C}_{\text{DOC}}$ (‰) | Depth (mbsf) | $\delta^{13}\text{C}_{\text{DOC}}$ (‰) |
|--------------|----------------------------------------|--------------|----------------------------------------|--------------|----------------------------------------|
|              | <b>M0081D</b>                          |              | <b>M0083D</b>                          |              | <b>M0084D</b>                          |
| 0.175        | -18.62                                 | 0.270        | -19.50                                 | 0.350        | -19.07                                 |
| 1.175        | -19.46                                 | 1.560        | -19.51                                 | 1.995        | -20.21                                 |
| 2.185        | -18.70                                 | 2.570        | -19.32                                 | 3.365        | -18.76                                 |
| 3.190        | -19.00                                 | 3.580        | -19.16                                 | 5.515        | -19.04                                 |
| 6.705        | -18.51                                 | 5.095        | -18.90                                 | 7.575        | -18.35                                 |
| 11.735       | -12.91                                 | 7.115        | -19.04                                 | 9.595        | -16.27                                 |
| 15.850       | -12.23                                 | 9.135        | -19.50                                 | 11.670       | -13.31                                 |
| 17.865       | -11.29                                 | 10.145       | -15.11                                 | 13.690       | -16.06                                 |
| 19.985       | -13.87                                 | 12.155       | -19.38                                 | 15.715       | -21.86                                 |
| 22.085       | -15.14                                 | 14.185       | -17.85                                 | 17.745       | -18.73                                 |
| 24.170       | -12.46                                 | 16.230       | -16.02                                 | 19.755       | -16.66                                 |
| 26.245       | -12.15                                 | 18.310       | -15.87                                 | 21.775       | -17.12                                 |
| 28.290       | -14.36                                 | 20.330       | -15.93                                 | 23.790       | -18.94                                 |
| 30.310       | -18.01                                 | 22.480       | -17.15                                 | 25.790       | -18.65                                 |
| 32.320       | -15.76                                 | 24.515       | -16.83                                 | 27.825       | -18.95                                 |
| 34.345       | -19.59                                 | 26.565       | -18.77                                 |              |                                        |
|              |                                        | 28.590       | -19.23                                 |              |                                        |
|              |                                        | 30.975       | -19.33                                 |              |                                        |
|              |                                        | 33.055       | -18.77                                 |              |                                        |



**Supplementary Table 6.** IW  $\delta^{13}\text{C}_{\text{DIC}}$  values of Holes M0081D, M0083D and M0084D.

| Depth (mbsf) | $\delta^{13}\text{C}_{\text{DIC}}$ (‰) | Depth (mbsf) | $\delta^{13}\text{C}_{\text{DIC}}$ (‰) | Depth (mbsf) | $\delta^{13}\text{C}_{\text{DIC}}$ (‰) |
|--------------|----------------------------------------|--------------|----------------------------------------|--------------|----------------------------------------|
|              | <b>M0081D</b>                          |              | <b>M0083D</b>                          |              | <b>M0084D</b>                          |
| 0.175        | -12.59                                 | 0.270        | -14.13                                 | 1.370        | -14.06                                 |
| 2.185        | -14.43                                 | 1.560        | -14.77                                 | 3.365        | -14.76                                 |
| 4.695        | -14.83                                 | 2.570        | -15.06                                 | 6.565        | -15.42                                 |
| 8.720        | -14.22                                 | 3.580        | -15.40                                 | 11.670       | -1.050                                 |
| 15.850       | -8.90                                  | 5.095        | -15.56                                 | 13.690       | 3.380                                  |
| 19.985       | -4.85                                  | 7.115        | -13.52                                 | 19.755       | 8.880                                  |
| 26.245       | -3.06                                  | 9.135        | -14.45                                 | 23.790       | 10.15                                  |
| 30.310       | -0.83                                  | 20.330       | -5.91                                  | 27.825       | 10.60                                  |
| 34.345       | -1.29                                  | 24.515       | -2.80                                  |              |                                        |
|              |                                        | 28.590       | -0.30                                  |              |                                        |
|              |                                        | 33.055       | 0.87                                   |              |                                        |

**Supplementary Table 7.** IW DO<sup>14</sup>C and DI<sup>14</sup>C ages of Holes M0081D, M0083D and M0084D.

| Depth (mbsf) | DO <sup>14</sup> C age (kyr) | DI <sup>14</sup> C age (kyr) | Depth (mbsf) | DO <sup>14</sup> C age (kyr) | DI <sup>14</sup> C age (kyr) | Depth (mbsf) | DO <sup>14</sup> C age (kyr) | DI <sup>14</sup> C age (kyr) |
|--------------|------------------------------|------------------------------|--------------|------------------------------|------------------------------|--------------|------------------------------|------------------------------|
|              | <b>M0081D</b>                |                              |              | <b>M0083D</b>                |                              |              | <b>M0084D</b>                |                              |
| 0.175        | 2.10 ± 0.025                 | 1.73 ± 0.02                  | 0.270        | 2.72 ± 0.035                 | 2.55 ± 0.02                  | 0.350        | 1.97 ± 0.04                  | 2.68 ± 0.03*                 |
| 1.175        | 1.84 ± 0.02                  | 1.88 ± 0.04*                 | 1.560        | 3.35 ± 0.035                 | 3.00 ± 0.02                  | 1.370        | 2.61 ± 0.08*                 | 2.94 ± 0.03                  |
| 2.185        | 1.91 ± 0.02                  | 2.04 ± 0.02                  | 2.570        | 3.42 ± 0.045                 | 3.10 ± 0.02                  | 1.995        | 3.00 ± 0.04                  | 3.10 ± 0.05*                 |
| 3.190        | 2.12 ± 0.02                  | 2.15 ± 0.04*                 | 3.580        | 3.52 ± 0.040                 | 3.35 ± 0.02                  | 3.365        | 4.03 ± 0.035                 | 3.45 ± 0.02                  |
| 4.695        | 2.32 ± 0.04*                 | 2.32 ± 0.02                  | 5.095        | 3.56 ± 0.035                 | 3.61 ± 0.02                  | 5.515        | 4.41 ± 0.035                 | 3.81 ± 0.04*                 |
| 6.705        | 2.59 ± 0.02                  | 2.57 ± 0.035*                | 7.115        | 3.66 ± 0.035                 | 3.90 ± 0.025                 | 6.565        | 4.31 ± 0.055*                | 3.98 ± 0.02                  |
| 8.720        | 2.78 ± 0.035*                | 2.82 ± 0.015                 | 9.135        | 4.64 ± 0.040                 | 4.62 ± 0.025                 | 7.575        | 4.21 ± 0.025                 | 4.10 ± 0.04*                 |
| 11.735       | 3.06 ± 0.015                 | 3.18 ± 0.035*                | 10.145       | 4.81 ± 0.040                 | 4.89 ± 0.055*                | 9.595        | 4.24 ± 0.03                  | 4.34 ± 0.04*                 |
| 15.850       | 3.31 ± 0.02                  | 3.68 ± 0.02                  | 12.155       | 5.08 ± 0.030                 | 5.42 ± 0.055*                | 11.670       | 4.36 ± 0.02                  | 4.59 ± 0.02                  |
| 17.865       | 3.60 ± 0.02                  | 4.01 ± 0.04*                 | 14.185       | 5.01 ± 0.030                 | 5.96 ± 0.055*                | 13.690       | 4.61 ± 0.025                 | 4.92 ± 0.025                 |
| 19.985       | 4.05 ± 0.02                  | 4.36 ± 0.02                  | 16.230       | 5.93 ± 0.030                 | 6.51 ± 0.055*                | 15.715       | 5.04 ± 0.025                 | 5.26 ± 0.05*                 |
| 22.085       | 4.40 ± 0.02                  | 4.79 ± 0.045*                | 18.310       | 5.91 ± 0.030                 | 7.06 ± 0.055*                | 17.745       | 5.25 ± 0.025                 | 5.60 ± 0.05*                 |
| 24.170       | 4.74 ± 0.02                  | 5.21 ± 0.045*                | 20.330       | 6.04 ± 0.030                 | 7.60 ± 0.03                  | 19.755       | 5.28 ± 0.025                 | 5.94 ± 0.025                 |
| 26.245       | 5.10 ± 0.02                  | 5.63 ± 0.025                 | 22.480       | 6.69 ± 0.030                 | 8.19 ± 0.06*                 | 21.775       | 5.93 ± 0.03                  | 6.33 ± 0.05*                 |
| 28.290       | 5.44 ± 0.02                  | 6.02 ± 0.05*                 | 24.515       | 7.54 ± 0.035                 | 8.74 ± 0.03                  | 23.790       | 6.12 ± 0.03                  | 6.71 ± 0.025                 |
| 30.310       | 6.17 ± 0.025                 | 6.41 ± 0.025                 | 26.565       | 8.81 ± 0.045                 | 9.58 ± 0.07*                 | 25.790       | 6.51 ± 0.035                 | 7.07 ± 0.055*                |
| 32.320       | 6.48 ± 0.025                 | 6.82 ± 0.055*                | 28.590       | 9.77 ± 0.05                  | 10.40 ± 0.04                 | 27.825       | 6.95 ± 0.035                 | 7.43 ± 0.03                  |
| 34.345       | 6.93 ± 0.03                  | 7.24 ± 0.03                  | 30.975       | 9.94 ± 0.05                  | 11.25 ± 0.095*               |              |                              |                              |
|              |                              |                              | 33.055       | 10.30 ± 0.055                | 12.00 ± 0.055                |              |                              |                              |
|              |                              |                              | 35.075       | 11.30 ± 0.07                 | 12.72 ± 0.055*               |              |                              |                              |

Note: Linearly extrapolated values used in Fig. 3 are marked by \*.

**Supplementary Table 8.** IW geochemical parameters of the studied IODP Sites.

| Depth (mbsf)  | Alkalinity (mM) | SO <sub>4</sub> <sup>2-</sup> (mM) | Depth (mbsf)  | Alkalinity (mM) | SO <sub>4</sub> <sup>2-</sup> (mM) | Depth (mbsf)  | Alkalinity (mM) | SO <sub>4</sub> <sup>2-</sup> (mM) |
|---------------|-----------------|------------------------------------|---------------|-----------------|------------------------------------|---------------|-----------------|------------------------------------|
| <b>M0081D</b> |                 |                                    | <b>M0082D</b> |                 |                                    | <b>M0083D</b> |                 |                                    |
| BW            | 2.53            | 28.80                              | 0.40          |                 | 21.09                              | BW            | 2.61            | 28.21                              |
| 0.18          | 17.70           | 20.12                              | 0.90          | 30.93           | 12.98                              | 0.27          | 24.68           | 16.53                              |
| 0.68          | 8.22            | 26.38                              | 1.41          | 37.88           | 9.02                               | 1.06          | 33.05           | 11.70                              |
| 1.18          | 25.64           | 16.00                              | 1.91          | 44.45           | 5.89                               | 1.56          | 37.04           | 9.68                               |
| 1.69          | 32.50           | 12.32                              | 2.42          | 48.23           | 3.65                               | 2.06          | 39.58           | 8.15                               |
| 2.19          | 40.02           | 8.26                               | 2.92          | 52.34           | 2.12                               | 2.57          | 42.10           | 6.98                               |
| 2.69          | 43.36           | 6.67                               | 3.43          | 54.95           | 1.00                               | 3.07          | 44.23           | 5.90                               |
| 3.19          | 47.06           | 5.01                               | 3.93          | 56.08           | 0.46                               | 3.58          | 45.23           | 5.32                               |
| 3.69          | 49.91           | 3.78                               | 4.44          | 57.90           | 0.15                               | 4.08          | 46.62           | 4.57                               |
| 4.19          | 50.97           | 3.20                               | 4.94          | 59.25           | 0.04                               | 5.10          | 48.59           | 3.62                               |
| 4.70          | 53.43           | 2.65                               | 5.95          | 62.19           | 0.13                               | 6.11          | 49.91           | 2.97                               |
| 5.70          | 56.53           | 1.53                               | 6.95          | 63.69           | 0.29                               | 7.12          | 50.11           | 2.90                               |
| 6.71          | 59.04           | 2.76                               | 7.96          | 65.01           | 0.09                               | 8.13          | 50.55           | 2.62                               |
| 7.71          | 56.85           | 0.61                               | 8.99          | 66.30           | 0.22                               | 9.14          | 50.09           | 2.46                               |
| 8.72          | 60.40           | 0.40                               | 10.01         | 66.61           | 0.35                               | 10.15         | 50.20           | 2.30                               |
| 9.73          | 60.69           | 0.28                               | 12.04         | 69.41           | 0.16                               | 12.16         | 53.46           | 0.83                               |
| 11.74         | 64.13           | 0.40                               | 14.10         | 70.74           | 0.15                               | 14.19         | 57.61           | 0.44                               |
| 13.75         | 66.79           | 0.91                               | 16.29         | 71.37           | 0.10                               | 16.23         | 56.44           | 1.17                               |
| 15.85         | 70.29           | 0.39                               | 18.35         | 71.39           | 0.15                               | 18.31         | 62.60           | 0.28                               |
| 17.87         | 72.14           | 0.26                               | 20.34         | 71.47           | 0.25                               | 20.33         | 64.94           | 0.20                               |
| 19.99         | 72.19           | 0.48                               | 22.42         | 71.47           | 0.06                               | 22.48         | 65.84           | 0.21                               |
| 22.09         | 72.74           | 0.34                               | 24.50         | 72.42           | 0.01                               | 24.52         | 66.24           | 0.46                               |

Continued

|       |       |      |       |       |      |       |       |      |
|-------|-------|------|-------|-------|------|-------|-------|------|
| 24.17 | 72.39 | 0.23 | 26.64 | 70.95 | 0.26 | 26.57 | 66.55 | 0.05 |
| 26.25 | 75.13 | 0.24 | 28.82 | 70.73 | 0.20 | 28.59 | 67.31 | 0.14 |
| 28.29 | 73.28 | 0.26 | 30.84 | 70.26 | 0.11 | 30.98 | 68.01 | 0.02 |
| 30.31 | 73.61 | 0.37 | 33.07 | 71.26 | 0.02 | 33.06 | 69.49 | 0.01 |
| 32.32 | 73.43 | 0.21 | 35.12 | 70.99 |      | 35.08 | 71.92 | 0.04 |
| 34.35 | 72.03 | 0.32 |       |       |      |       |       |      |

| Depth (mbsf) | Alkalinity (mM) | SO <sub>4</sub> <sup>2-</sup> (mM) | Depth (mbsf) | Alkalinity (mM) | SO <sub>4</sub> <sup>2-</sup> (mM) | Depth (mbsf) | Alkalinity (mM) | SO <sub>4</sub> <sup>2-</sup> (mM) |
|--------------|-----------------|------------------------------------|--------------|-----------------|------------------------------------|--------------|-----------------|------------------------------------|
|              | <b>M0084D</b>   |                                    |              | <b>M0086B</b>   |                                    |              | <b>M0088D</b>   |                                    |
| BW           | 2.70            | 28.39                              | 0.11         | 16.68           | 21.26                              | 0.45         | 25.89           | 16.61                              |
| 0.35         | 13.42           | 23.04                              | 0.61         | 17.06           | 21.37                              | 0.95         | 33.65           | 12.53                              |
| 0.85         | 23.50           | 17.67                              | 1.10         | 30.01           | 14.27                              | 1.52         | 37.88           | 10.29                              |
| 1.37         | 30.37           | 14.92                              | 1.60         | 31.67           | 12.70                              | 2.02         | 41.16           | 8.47                               |
| 2.00         | 35.70           | 12.21                              | 2.12         | 32.58           | 12.05                              | 2.52         | 44.81           | 6.47                               |
| 2.36         | 37.37           | 11.55                              | 2.62         | 33.94           | 10.51                              | 3.02         | 48.12           | 4.49                               |
| 2.74         | 38.97           | 10.72                              | 3.12         | 35.91           | 10.30                              | 3.53         | 51.12           | 3.57                               |
| 3.37         | 40.94           | 9.74                               | 3.62         | 37.76           | 9.03                               | 4.03         | 54.62           | 1.36                               |
| 4.38         | 46.77           | 6.30                               | 4.13         | 39.34           | 8.12                               | 4.54         | 57.54           | 0.35                               |
| 5.52         | 53.45           | 3.06                               | 4.63         | 41.20           | 7.32                               | 5.04         | 59.30           | 0.09                               |
| 6.57         | 60.15           | 0.32                               | 5.63         | 44.78           | 5.69                               | 6.06         | 61.90           | 0.16                               |
| 7.58         | 62.68           | 0.25                               | 6.64         | 12.20           | 23.23                              | 7.15         | 64.39           | 0.15                               |
| 8.59         | 65.84           | 0.10                               | 7.64         | 50.99           | 2.99                               | 8.15         | 67.13           | 0.13                               |
| 9.60         | 69.20           | 0.34                               | 8.65         | 54.87           | 1.50                               | 9.16         | 68.61           | 0.12                               |
| 11.67        | 74.95           | 0.14                               | 9.66         | 57.55           | 0.56                               | 10.17        | 69.67           | 0.15                               |
| 13.69        | 81.23           | 0.13                               | 10.67        | 59.37           | 0.31                               | 12.18        | 73.14           | 0.46                               |
| 15.72        | 85.97           | 0.15                               | 12.70        | 62.45           | 0.24                               | 14.19        | 79.27           | 0.26                               |

Continued

|       |       |      |       |       |      |       |       |      |
|-------|-------|------|-------|-------|------|-------|-------|------|
| 17.75 | 92.19 | 0.05 | 14.75 | 64.76 | 0.09 | 16.20 | 82.86 | 0.17 |
| 19.76 | 94.12 | 0.28 | 16.79 | 67.16 | 0.07 | 18.26 | 88.36 | 0.16 |
| 21.78 | 96.45 | 0.24 |       |       |      | 20.23 | 92.59 | 0.10 |
| 23.79 | 97.86 | 0.12 |       |       |      | 22.27 | 92.90 | 0.15 |
| 25.79 | 94.50 | 0.08 |       |       |      | 24.32 | 97.07 | 0.12 |
| 27.83 | 95.38 |      |       |       |      | 26.37 | 96.14 | 0.06 |
| 29.83 | 88.61 | 0.01 |       |       |      | 28.38 | 95.16 | 0.12 |
| 31.90 | 84.74 |      |       |       |      | 30.21 | 92.50 |      |
| 33.91 | 79.49 | 0.01 |       |       |      | 32.76 | 88.83 |      |
|       |       |      |       |       |      | 34.77 | 85.90 |      |

| Depth (mbsf) | Alkalinity (mM) | SO <sub>4</sub> <sup>2-</sup> (mM) | Depth (mbsf) | Alkalinity (mM) | SO <sub>4</sub> <sup>2-</sup> (mM) | Depth (mbsf) | Alkalinity (mM) | SO <sub>4</sub> <sup>2-</sup> (mM) |
|--------------|-----------------|------------------------------------|--------------|-----------------|------------------------------------|--------------|-----------------|------------------------------------|
|              | <b>M0089D</b>   |                                    |              | <b>M0090D</b>   |                                    |              | <b>M0091D</b>   |                                    |
| 0.35         | 11.51           | 23.39                              | 0.35         | 21.48           | 16.93                              | 0.10         | 7.63            | 25.84                              |
| 0.85         | 20.56           | 17.49                              | 0.71         | 21.30           | 16.80                              | 0.60         | 11.94           | 22.51                              |
| 1.36         | 24.77           | 14.39                              | 1.21         | 30.31           | 10.84                              | 1.10         | 18.70           | 19.80                              |
| 1.86         | 29.61           | 11.84                              | 1.71         | 34.99           | 7.77                               | 1.62         | 22.18           | 17.14                              |
| 2.37         | 31.45           | 10.32                              | 2.21         | 39.37           | 4.95                               | 2.12         | 26.13           | 15.45                              |
| 2.87         | 33.41           | 9.00                               | 2.72         | 41.06           | 3.98                               | 2.63         | 27.29           | 14.82                              |
| 3.38         | 36.06           | 7.76                               | 3.22         | 44.23           | 2.37                               | 3.13         | 29.56           | 13.47                              |
| 3.88         | 37.54           | 6.35                               | 3.73         | 47.18           | 1.06                               | 3.63         | 31.55           | 12.44                              |
| 4.39         | 39.23           | 5.22                               | 4.23         | 47.99           | 0.56                               | 4.13         | 34.26           | 10.99                              |
| 4.89         | 41.21           | 3.61                               | 5.23         | 51.48           | 0.15                               | 5.14         | 38.22           | 9.53                               |
| 5.90         | 46.74           | 1.57                               | 6.24         | 52.82           | 0.15                               | 6.15         | 40.85           | 8.38                               |
| 6.90         | 48.90           | 0.56                               | 7.30         | 53.57           | 0.48                               | 7.15         | 41.96           | 7.75                               |
| 7.91         | 50.73           | 0.15                               | 8.32         | 55.08           | 0.35                               | 8.16         | 42.75           | 7.10                               |

Continued

|       |       |      |       |       |      |       |       |      |
|-------|-------|------|-------|-------|------|-------|-------|------|
| 8.92  | 51.84 | 0.16 | 9.36  | 50.83 | 2.63 | 9.17  | 45.10 | 5.91 |
| 9.93  | 53.61 | 0.22 | 11.38 | 58.86 | 0.35 | 11.19 | 51.52 | 2.74 |
| 11.96 | 55.12 | 0.21 | 13.44 | 61.21 | 0.20 | 13.21 | 60.48 | 0.31 |
| 14.01 | 57.77 | 0.11 | 15.51 | 63.61 | 0.09 | 15.24 | 63.20 | 0.41 |
| 16.12 | 59.10 | 0.09 | 17.54 | 64.86 | 0.08 | 17.25 | 64.66 | 0.30 |
| 18.22 | 61.06 | 0.14 | 19.77 | 65.82 | 0.24 | 19.28 | 67.31 | 0.06 |
| 20.33 | 62.07 | 0.05 | 21.86 | 67.62 | 0.16 | 21.30 | 68.29 | 0.12 |
| 22.48 | 64.26 | 0.20 | 23.97 | 69.55 | 0.15 | 23.32 | 68.14 | 0.25 |
| 24.60 | 65.29 | 0.23 | 26.10 | 67.85 | 0.01 | 25.31 | 68.86 | 0.25 |
| 26.80 | 66.07 | 0.26 | 28.22 | 70.12 |      | 27.50 | 69.33 | 0.23 |
| 28.92 | 66.28 | 0.01 | 30.30 | 70.37 |      | 29.65 | 67.72 | 0.67 |
| 31.10 | 67.78 | 0.01 | 32.39 | 70.81 |      |       |       |      |
| 33.26 | 68.50 |      |       |       |      |       |       |      |
| 35.31 | 69.27 |      |       |       |      |       |       |      |

| Depth (mbsf) | Alkalinity (mM) | SO <sub>4</sub> <sup>2-</sup> (mM) | Depth (mbsf) | Alkalinity (mM) | SO <sub>4</sub> <sup>2-</sup> (mM) | Depth (mbsf) | Alkalinity (mM) | SO <sub>4</sub> <sup>2-</sup> (mM) |
|--------------|-----------------|------------------------------------|--------------|-----------------|------------------------------------|--------------|-----------------|------------------------------------|
|              | <b>M0092D</b>   |                                    |              | <b>M0093B</b>   |                                    |              | <b>M0095B</b>   |                                    |
| 0.21         | 7.07            | 25.42                              | 0.33         | 18.19           | 20.22                              | 0.61         | 17.69           | 18.46                              |
| 0.71         |                 | 20.48                              | 0.83         | 22.73           | 18.26                              | 1.11         | 24.66           | 14.87                              |
| 1.23         | 23.88           | 15.40                              | 1.33         | 24.98           | 17.13                              | 1.62         | 28.99           | 12.48                              |
| 1.73         | 27.82           | 13.58                              | 1.83         | 29.33           | 14.97                              | 2.12         | 32.37           | 10.43                              |
| 2.23         | 31.71           | 11.20                              | 2.33         | 31.30           | 13.84                              | 2.62         | 36.71           | 8.28                               |
| 2.73         | 34.56           | 9.36                               | 2.84         | 32.69           | 13.39                              | 3.12         | 39.37           | 6.46                               |
| 3.24         | 37.21           | 7.82                               | 3.34         | 35.06           | 11.97                              | 3.63         | 42.28           | 5.14                               |
| 3.74         | 39.02           | 6.70                               | 3.85         | 36.74           | 11.30                              | 4.13         | 44.41           | 4.04                               |
| 4.25         | 40.86           | 5.82                               | 4.35         | 37.40           | 11.40                              | 5.13         | 47.28           | 3.11                               |

Continued

---

|       |       |      |       |       |       |       |       |      |
|-------|-------|------|-------|-------|-------|-------|-------|------|
| 4.76  | 41.88 | 4.95 | 5.35  | 38.04 | 11.13 | 6.14  | 53.84 | 0.26 |
| 5.76  | 44.00 | 3.56 | 6.36  | 37.75 | 11.08 | 7.14  | 56.89 | 0.20 |
| 6.77  | 47.41 | 2.12 | 7.37  | 36.96 | 11.06 | 8.14  | 58.22 | 0.03 |
| 7.78  | 49.52 | 0.65 | 8.38  | 37.73 | 10.39 | 9.16  | 60.11 | 0.06 |
| 8.78  | 52.30 | 0.12 | 9.38  | 37.92 | 9.68  | 10.16 | 60.76 | 0.13 |
| 9.79  | 54.68 | 0.07 | 10.39 | 38.98 | 8.44  | 12.19 | 63.10 | 0.04 |
| 11.79 | 55.79 | 0.09 | 12.39 | 45.19 | 4.54  | 14.20 | 64.44 | 0.17 |
| 13.82 | 57.33 | 0.69 | 14.41 | 53.55 | 1.13  | 16.30 | 65.53 | 0.25 |
| 15.84 | 57.62 | 0.91 | 16.42 | 53.41 | 2.52  | 18.39 | 65.84 | 0.22 |
| 17.89 | 60.69 | 0.12 | 18.46 | 61.73 | 0.24  | 20.50 | 67.13 | 0.03 |
| 19.96 | 60.41 | 0.14 | 20.51 | 63.77 | 0.12  | 22.63 | 68.74 |      |
| 22.05 | 59.10 | 0.51 | 22.61 | 65.88 | 0.01  | 24.75 | 69.07 | 0.01 |
| 24.15 | 60.49 | 0.01 | 24.76 | 66.97 | 0.08  | 26.76 | 69.06 | 0.04 |
| 26.25 | 59.79 | 0.01 |       |       |       |       |       |      |
| 28.33 | 55.55 |      |       |       |       |       |       |      |
| 30.45 | 57.40 |      |       |       |       |       |       |      |
| 32.54 | 56.57 |      |       |       |       |       |       |      |

---

**Supplementary Table 9.** Headspace gas concentrations of the studied IODP Sites.

| Depth (mbsf)  | Methane (ppm) | Ethane (ppm) | Propane (ppm) | Methane (mM) | C <sub>1</sub> /(C <sub>2</sub> +C <sub>3</sub> ) |
|---------------|---------------|--------------|---------------|--------------|---------------------------------------------------|
| <b>M0081F</b> |               |              |               |              |                                                   |
| 1.07          | 135.61        | 0.49         | 0.37          | 0.03         | 158                                               |
| 2.02          | 161.87        | 0.62         | 0.48          | 0.04         | 147                                               |
| 3.03          | 216.16        | 0.61         | 0.51          | 0.05         | 193                                               |
| 4.05          | 150.86        | 0.44         | 0.34          | 0.04         | 195                                               |
| 5.06          | 149.42        | 0.53         | 0.44          | 0.04         | 154                                               |
| 6.06          | 225.02        | 0.52         | 0.43          | 0.06         | 238                                               |
| 7.08          | 227.26        | 0.54         | 0.44          | 0.06         | 232                                               |
| 8.09          | 476.09        | 0.47         | 0.35          | 0.12         | 577                                               |
| 9.09          | 778.93        | 0.54         | 0.42          | 0.19         | 809                                               |
| 10.10         | 1268.00       | 0.70         | 0.59          | 0.31         | 983                                               |
| 11.11         | 2272.10       | 0.54         | 0.43          | 0.56         | 2345                                              |
| 12.12         | 3825.65       | 0.60         | 0.50          | 0.95         | 3493                                              |
| 13.13         | 6123.59       | 0.70         | 0.59          | 1.51         | 4732                                              |
| 14.13         | 8246.61       | 0.73         | 0.63          | 2.00         | 6061                                              |
| 15.15         | 4010.07       | 0.56         | 0.45          | 0.93         | 3971                                              |
| 16.20         | 7343.16       | 0.62         | 0.52          | 1.74         | 6449                                              |
| 17.25         | 11736.92      | 0.65         | 0.54          | 2.87         | 9818                                              |
| 18.29         | 8461.78       | 0.62         | 0.49          | 2.05         | 7636                                              |
| 19.34         | 10775.88      | 0.56         | 0.46          | 2.62         | 10633                                             |
| 20.40         | 8044.30       | 0.51         | 0.42          | 1.92         | 8671                                              |
| 21.45         | 5887.26       | 0.56         | 0.46          | 1.42         | 5760                                              |
| 22.50         | 10733.84      | 0.65         | 0.57          | 2.53         | 8853                                              |



Continued

|       |          |      |      |      |       |
|-------|----------|------|------|------|-------|
| 23.59 | 12808.39 | 0.53 | 0.45 | 3.08 | 13025 |
| 24.68 | 7771.12  | 0.85 | 0.81 | 2.02 | 4658  |
| 25.77 | 6963.16  | 0.83 | 0.75 | 1.84 | 4392  |
| 26.83 | 6292.99  | 0.70 | 0.58 | 1.36 | 4909  |
| 27.89 | 16804.91 | 0.64 | 0.54 | 4.04 | 14312 |
| 28.94 | 10471.45 | 0.56 | 0.46 | 2.56 | 10218 |
| 30.04 | 22096.76 | 0.61 | 0.51 | 5.44 | 19577 |
| 31.12 | 21046.27 | 0.48 | 0.42 | 5.18 | 23466 |
| 32.17 | 6398.92  | 0.83 | 0.72 | 1.56 | 4128  |
| 33.22 | 17547.78 | 0.40 | 0.30 | 4.45 | 25291 |
| 34.23 | 23556.55 | 0.92 | 0.79 | 5.97 | 13718 |
| 35.24 | 12541.68 | 0.81 | 0.69 | 3.30 | 8357  |
| 36.25 | 20261.72 | 0.95 | 0.91 | 5.39 | 10873 |
| 37.29 | 13158.67 | 0.93 | 0.85 | 3.32 | 7402  |

**Depth (mbsf)**

**Methane (ppm)**

**Ethane (ppm)**

**Propane (ppm)**

**Methane (mM)**

**C<sub>1</sub>/(C<sub>2</sub>+C<sub>3</sub>)**

**M0082D**

|      |          |      |      |      |       |
|------|----------|------|------|------|-------|
| 1.06 | 119.10   | 0.34 | 0.28 | 0.03 | 193   |
| 2.07 | 188.30   | 0.36 | 0.30 | 0.05 | 285   |
| 3.08 | 317.57   | 0.41 | 0.31 | 0.08 | 442   |
| 4.09 | 1328.18  | 0.50 | 0.40 | 0.32 | 1473  |
| 5.10 | 3543.37  | 0.85 | 0.78 | 0.89 | 2175  |
| 6.10 | 5728.28  | 0.60 | 0.50 | 1.34 | 5216  |
| 7.11 | 8147.69  | 0.47 | 0.40 | 1.89 | 9400  |
| 8.12 | 8409.59  | 0.55 | 0.46 | 2.00 | 8359  |
| 9.14 | 13560.98 | 0.49 | 0.43 | 3.22 | 14702 |

Continued

---

|       |          |      |      |      |       |
|-------|----------|------|------|------|-------|
| 10.17 | 10317.81 | 0.44 | 0.37 | 2.40 | 12760 |
| 11.19 | 17650.17 | 0.31 | 0.25 | 4.46 | 31494 |
| 12.21 | 14418.14 | 0.65 | 0.58 | 3.53 | 11808 |
| 13.22 | 11600.49 | 0.61 | 0.52 | 2.78 | 10252 |
| 14.26 | 14703.98 | 0.44 | 0.32 | 3.46 | 19220 |
| 15.30 | 12098.20 | 0.65 | 0.55 | 2.76 | 10041 |
| 16.34 | 16831.11 | 0.48 | 0.39 | 4.14 | 19339 |
| 17.36 | 14363.99 | 0.64 | 0.55 | 3.40 | 12020 |
| 18.40 | 20713.67 | 0.73 | 0.64 | 4.71 | 15172 |
| 19.44 | 5330.24  | 0.64 | 0.54 | 1.25 | 4496  |
| 20.49 | 12990.37 | 1.07 | 0.92 | 3.00 | 6515  |
| 21.55 | 17219.19 | 0.75 | 0.64 | 4.02 | 12342 |
| 22.57 | 18374.30 | 0.59 | 0.51 | 4.33 | 16709 |
| 23.60 | 9485.97  | 0.84 | 0.77 | 2.32 | 5896  |
| 24.66 | 17699.55 | 0.81 | 0.70 | 4.23 | 11727 |
| 25.71 | 4769.92  | 0.81 | 0.68 | 1.19 | 3210  |
| 26.80 | 20263.13 | 0.80 | 0.70 | 5.05 | 13455 |
| 27.91 | 24402.73 | 1.10 | 0.99 | 5.84 | 11660 |
| 28.97 | 21699.67 | 0.91 | 0.76 | 5.18 | 12987 |
| 30.04 | 16081.24 | 0.56 | 0.47 | 3.93 | 15654 |
| 31.12 | 5621.42  | 0.92 | 0.77 | 1.36 | 3327  |
| 32.17 | 20247.50 | 0.66 | 0.58 | 4.90 | 16319 |
| 33.23 | 19858.59 | 0.78 | 0.66 | 4.97 | 13831 |
| 34.24 | 16370.77 | 0.84 | 0.69 | 3.90 | 10680 |
| 35.29 | 14348.44 | 0.86 | 0.68 | 3.50 | 9259  |

Continued

| 36.35        | 10149.19      | 0.98          | 0.79          | 2.49         | 5741                                              |
|--------------|---------------|---------------|---------------|--------------|---------------------------------------------------|
| Depth (mbsf) | Methane (ppm) | Ethane (ppm)  | Propane (ppm) | Methane (mM) | C <sub>1</sub> /(C <sub>2</sub> +C <sub>3</sub> ) |
|              |               | <b>M0083D</b> |               |              |                                                   |
| 0.41         | 260.22        | 0.80          | 0.65          | 0.06         | 179                                               |
| 1.21         | 515.91        | 0.99          | 0.78          | 0.13         | 292                                               |
| 2.22         | 376.51        | 0.73          | 0.58          | 0.10         | 288                                               |
| 3.23         | 263.78        | 0.48          | 0.36          | 0.07         | 311                                               |
| 4.25         | 369.34        | 0.71          | 0.54          | 0.09         | 295                                               |
| 5.26         | 411.78        | 0.84          | 0.64          | 0.10         | 278                                               |
| 6.27         | 374.67        | 0.73          | 0.57          | 0.10         | 288                                               |
| 7.28         | 286.32        | 0.75          | 0.59          | 0.07         | 214                                               |
| 8.29         | 399.19        | 0.81          | 0.63          | 0.10         | 278                                               |
| 9.30         | 1647.49       | 0.43          | 0.33          | 0.39         | 2165                                              |
| 10.30        | 2874.64       | 0.45          | 0.32          | 0.72         | 3703                                              |
| 11.31        | 4465.27       | 0.53          | 0.38          | 1.12         | 4882                                              |
| 12.31        | 4708.52       | 0.46          | 0.34          | 1.18         | 5872                                              |
| 13.33        | 6240.15       | 0.66          | 0.48          | 1.59         | 5484                                              |
| 14.34        | 9989.43       | 0.53          | 0.35          | 2.34         | 11448                                             |
| 15.37        | 5943.35       | 2.00          | 2.09          | 1.41         | 1453                                              |
| 16.44        | 5963.29       | 2.34          | 2.47          | 1.53         | 1239                                              |
| 17.45        | 8857.46       | 2.25          | 2.41          | 2.41         | 1901                                              |
| 18.47        | 5689.59       | 1.00          | 0.98          | 1.37         | 2875                                              |
| 19.48        | 9900.06       | 2.74          | 3.05          | 2.64         | 1708                                              |
| 20.56        | 5183.22       | 0.64          | 0.56          | 1.21         | 4335                                              |
| 21.63        | 19692.16      | 0.84          | 0.71          | 4.55         | 12703                                             |

Continued

|       |          |      |      |      |       |
|-------|----------|------|------|------|-------|
| 22.66 | 13225.49 | 1.01 | 0.91 | 3.15 | 6867  |
| 23.67 | 11043.92 | 0.57 | 0.45 | 2.53 | 10863 |
| 24.68 | 17388.11 | 0.67 | 0.53 | 4.17 | 14513 |
| 25.72 | 10244.94 | 0.62 | 0.51 | 2.49 | 9072  |
| 26.74 | 18823.22 | 0.66 | 0.52 | 4.77 | 16052 |
| 27.74 | 18035.89 | 3.07 | 3.58 | 4.71 | 2710  |
| 28.75 | 12953.27 | 3.27 | 3.89 | 3.68 | 1810  |
| 29.76 | 17284.90 | 0.89 | 0.71 | 4.12 | 10792 |
| 31.12 | 10548.72 | 0.69 | 0.57 | 2.72 | 8419  |
| 32.21 | 18177.04 | 1.30 | 1.20 | 4.57 | 7272  |
| 33.21 | 19256.86 | 0.92 | 0.73 | 4.78 | 11689 |
| 34.23 | 21933.69 | 1.10 | 0.90 | 5.43 | 10960 |
| 35.23 | 13750.42 | 0.75 | 0.62 | 3.47 | 10102 |
| 36.32 | 13207.47 | 1.13 | 0.96 | 3.30 | 6338  |

| <b>Depth (mbsf)</b> | <b>Methane (ppm)</b> | <b>Ethane (ppm)</b> | <b>Propane (ppm)</b> | <b>Methane (mM)</b> | <b>C<sub>1</sub>/(C<sub>2</sub>+C<sub>3</sub>)</b> |
|---------------------|----------------------|---------------------|----------------------|---------------------|----------------------------------------------------|
|---------------------|----------------------|---------------------|----------------------|---------------------|----------------------------------------------------|

**M0084F**

|      |          |      |      |      |      |
|------|----------|------|------|------|------|
| 0.95 | 304.04   | 0.43 | 0.31 | 0.07 | 412  |
| 1.89 | 544.78   | 0.39 | 0.26 | 0.13 | 843  |
| 2.42 | 256.35   | 0.46 | 0.31 | 0.05 | 334  |
| 3.43 | 783.83   | 0.83 | 0.65 | 0.20 | 529  |
| 4.44 | 990.61   | 0.91 | 0.71 | 0.26 | 613  |
| 5.45 | 1963.63  | 0.97 | 0.74 | 0.51 | 1146 |
| 6.47 | 9186.69  | 0.90 | 0.69 | 2.29 | 5793 |
| 7.51 | 15351.80 | 0.92 | 0.68 | 3.68 | 9628 |
| 8.57 | 14747.94 | 0.98 | 0.72 | 3.52 | 8649 |

Continued

---

|       |          |      |      |      |       |
|-------|----------|------|------|------|-------|
| 9.63  | 20474.15 | 0.91 | 0.69 | 4.93 | 12818 |
| 10.72 | 18852.46 | 0.85 | 0.62 | 4.47 | 12835 |
| 11.81 | 12258.48 | 0.99 | 0.77 | 2.97 | 6959  |
| 12.84 | 18241.50 | 0.78 | 0.59 | 4.40 | 13371 |
| 13.85 | 14421.42 | 0.94 | 0.72 | 3.51 | 8707  |
| 14.86 | 18717.72 | 1.00 | 0.83 | 4.72 | 10236 |
| 15.87 | 17324.15 | 0.97 | 0.76 | 4.26 | 10047 |
| 16.88 | 14953.70 | 0.89 | 0.74 | 4.26 | 9158  |
| 17.90 | 13150.53 | 0.93 | 0.76 | 3.40 | 7774  |
| 18.90 | 6924.64  | 1.66 | 1.39 | 1.92 | 2270  |
| 19.95 | 19696.86 | 0.40 | 0.33 | 4.31 | 27134 |
| 21.00 | 14540.00 | 0.47 | 0.40 | 3.45 | 16752 |
| 22.04 | 16415.30 | 0.65 | 0.53 | 3.77 | 13873 |
| 23.06 | 24660.54 | 0.58 | 0.50 | 5.37 | 22919 |
| 24.11 | 20711.54 | 0.47 | 0.42 | 4.66 | 23292 |
| 25.17 | 29633.45 | 0.40 | 0.32 | 6.71 | 40715 |
| 26.25 | 18779.60 | 0.72 | 0.59 | 4.05 | 14298 |
| 27.31 | 12464.10 | 0.81 | 0.68 | 2.96 | 8378  |
| 28.37 | 28997.19 | 0.47 | 0.40 | 6.54 | 33374 |
| 29.37 | 18898.15 | 0.39 | 0.32 | 4.31 | 26832 |
| 30.37 | 24938.23 | 0.52 | 0.41 | 6.07 | 26994 |
| 31.43 | 18933.95 | 0.60 | 0.47 | 4.43 | 17821 |
| 32.50 | 16576.06 | 0.46 | 0.35 | 3.97 | 20462 |
| 34.06 | 15148.18 | 0.66 | 0.57 | 3.78 | 12310 |
| 35.12 | 25917.57 | 0.86 | 0.72 | 6.16 | 16359 |

Continued

|       |          |      |      |      |       |
|-------|----------|------|------|------|-------|
| 36.18 | 22840.60 | 0.52 | 0.44 | 5.64 | 23828 |
| 37.26 | 24873.85 | 0.78 | 0.66 | 6.16 | 17347 |
| 38.31 | 17948.24 | 0.68 | 0.54 | 4.51 | 14705 |

| Depth (mbsf) | Methane (ppm) | Ethane (ppm) | Propane (ppm) | Methane (mM) | C <sub>1</sub> /(C <sub>2</sub> +C <sub>3</sub> ) |
|--------------|---------------|--------------|---------------|--------------|---------------------------------------------------|
|--------------|---------------|--------------|---------------|--------------|---------------------------------------------------|

**M0086B**

|       |          |      |      |      |       |
|-------|----------|------|------|------|-------|
| 0.75  | 186.02   | 0.57 | 0.47 | 0.04 | 180   |
| 1.77  | 253.35   | 0.75 | 0.61 | 0.06 | 187   |
| 2.77  | 237.97   | 0.77 | 0.61 | 0.06 | 172   |
| 3.78  | 176.39   | 0.68 | 0.51 | 0.04 | 148   |
| 4.78  | 196.43   | 0.54 | 0.42 | 0.05 | 204   |
| 5.79  | 761.92   | 1.84 | 1.90 | 0.19 | 204   |
| 6.79  | 160.09   | 0.50 | 0.33 | 0.04 | 192   |
| 7.80  | 539.45   | 0.85 | 0.68 | 0.14 | 353   |
| 8.81  | 607.81   | 0.96 | 0.80 | 0.16 | 347   |
| 9.82  | 956.23   | 0.79 | 0.60 | 0.25 | 686   |
| 10.83 | 2794.71  | 0.89 | 0.68 | 0.71 | 1788  |
| 11.84 | 7007.41  | 0.99 | 0.77 | 1.77 | 3987  |
| 12.86 | 10731.35 | 0.79 | 0.63 | 2.70 | 7541  |
| 13.90 | 16965.09 | 0.70 | 0.51 | 4.31 | 13951 |
| 14.93 | 18677.69 | 0.97 | 0.75 | 4.98 | 10857 |
| 15.94 | 15181.19 | 0.51 | 0.39 | 4.12 | 16867 |
| 16.94 | 16653.42 | 0.87 | 0.70 | 4.82 | 10559 |
| 17.96 | 14476.48 | 0.67 | 0.50 | 4.33 | 12419 |

Continued

---

| Depth (mbsf) | Methane (ppm) | Ethane (ppm)  | Propane (ppm) | Methane (mM) | C <sub>1</sub> /(C <sub>2</sub> +C <sub>3</sub> ) |
|--------------|---------------|---------------|---------------|--------------|---------------------------------------------------|
|              |               | <b>M0088D</b> |               |              |                                                   |
| 1.10         | 138.86        | 0.46          | 0.32          | 0.03         | 178                                               |
| 2.17         | 564.91        | 0.75          | 0.63          | 0.14         | 408                                               |
| 3.18         | 668.45        | 1.03          | 0.80          | 0.17         | 366                                               |
| 4.19         | 937.34        | 0.87          | 0.69          | 0.24         | 601                                               |
| 5.20         | 4555.71       | 0.97          | 0.74          | 1.18         | 2656                                              |
| 6.22         | 11504.37      | 1.07          | 0.84          | 2.82         | 6038                                              |
| 7.30         | 14106.44      | 0.38          | 0.28          | 3.47         | 21440                                             |
| 8.31         | 15518.82      | 0.66          | 0.51          | 3.85         | 13202                                             |
| 9.32         | 17517.88      | 1.15          | 0.90          | 4.22         | 8578                                              |
| 10.32        | 14495.17      | 0.51          | 0.42          | 3.48         | 15579                                             |
| 11.33        | 22379.94      | 0.61          | 0.51          | 5.31         | 19856                                             |
| 12.33        | 14351.33      | 0.88          | 0.74          | 3.41         | 8824                                              |
| 13.34        | 14323.07      | 0.76          | 0.63          | 3.36         | 10302                                             |
| 14.34        | 12689.75      | 1.77          | 1.48          | 3.48         | 3900                                              |
| 15.35        | 12728.81      | 0.24          | 0.18          | 2.85         | 30159                                             |
| 16.36        | 14302.03      | 0.57          | 0.50          | 3.17         | 13416                                             |
| 17.41        | 16379.41      | 0.53          | 0.47          | 3.72         | 16485                                             |
| 18.37        | 19154.57      | 0.46          | 0.38          | 4.32         | 22882                                             |
| 19.38        | 18628.37      | 0.58          | 0.53          | 4.09         | 16806                                             |
| 20.38        | 20176.38      | 0.43          | 0.36          | 4.37         | 25457                                             |
| 21.39        | 16824.10      | 0.94          | 0.78          | 3.81         | 9820                                              |
| 22.39        | 13888.02      | 0.30          | 0.24          | 3.17         | 25853                                             |
| 23.40        | 13851.89      | 0.36          | 0.26          | 3.15         | 22372                                             |

Continued

|       |          |      |      |      |       |
|-------|----------|------|------|------|-------|
| 24.47 | 16752.67 | 0.46 | 0.37 | 3.81 | 20063 |
| 25.52 | 14154.46 | 0.53 | 0.43 | 3.26 | 14784 |
| 26.52 | 20269.85 | 0.64 | 0.53 | 4.70 | 17311 |
| 27.53 | 19588.51 | 0.45 | 0.34 | 4.78 | 24892 |
| 28.54 | 14898.15 | 0.99 | 0.83 | 3.36 | 8160  |
| 29.40 | 9250.76  | 0.80 | 0.67 | 2.10 | 6308  |
| 30.36 | 11461.77 | 0.65 | 0.51 | 2.59 | 9846  |
| 31.91 | 14528.43 | 0.64 | 0.49 | 3.69 | 12831 |
| 32.91 | 16053.13 | 0.63 | 0.55 | 3.94 | 13692 |
| 33.92 | 15191.41 | 0.62 | 0.50 | 3.74 | 13552 |
| 34.92 | 14616.20 | 0.76 | 0.63 | 3.70 | 10492 |
| 35.95 | 16230.85 | 0.71 | 0.57 | 3.83 | 12653 |

| Depth (mbsf) | Methane (ppm) | Ethane (ppm) | Propane (ppm) | Methane (mM) | C <sub>1</sub> /(C <sub>2</sub> +C <sub>3</sub> ) |
|--------------|---------------|--------------|---------------|--------------|---------------------------------------------------|
|              |               | M0089D       |               |              |                                                   |
| 1.01         | 119.32        | 0.44         | 0.31          | 0.03         | 158                                               |
| 2.02         | 440.27        | 0.67         | 0.55          | 0.11         | 360                                               |
| 3.03         | 107.58        | 0.52         | 0.40          | 0.03         | 117                                               |
| 4.04         | 203.33        | 0.58         | 0.43          | 0.05         | 202                                               |
| 5.05         | 2766.88       | 3.42         | 3.77          | 0.80         | 384                                               |
| 6.05         | 331.50        | 0.51         | 0.42          | 0.08         | 355                                               |
| 7.06         | 1215.15       | 0.60         | 0.40          | 0.29         | 1221                                              |
| 8.07         | 3241.60       | 0.65         | 0.49          | 0.77         | 2846                                              |
| 9.08         | 5278.70       | 0.58         | 0.42          | 1.24         | 5273                                              |
| 10.09        | 6759.82       | 0.61         | 0.46          | 1.60         | 6339                                              |
| 11.11        | 9489.57       | 0.89         | 0.76          | 2.31         | 5742                                              |



Continued

---

|       |          |      |      |      |       |
|-------|----------|------|------|------|-------|
| 12.12 | 10268.93 | 1.67 | 1.77 | 2.63 | 2985  |
| 13.14 | 12341.34 | 0.93 | 0.81 | 3.02 | 7100  |
| 14.18 | 7368.08  | 0.57 | 0.47 | 1.93 | 7059  |
| 15.23 | 10536.53 | 0.79 | 0.62 | 2.55 | 7476  |
| 16.28 | 16855.80 | 0.99 | 0.81 | 4.18 | 9365  |
| 17.33 | 18290.76 | 1.53 | 1.53 | 4.37 | 5988  |
| 18.38 | 21555.74 | 0.96 | 0.74 | 5.18 | 12709 |
| 19.43 | 21168.18 | 0.96 | 0.73 | 5.13 | 12466 |
| 20.50 | 12035.09 | 0.61 | 0.44 | 2.94 | 11374 |
| 21.58 | 15697.20 | 1.06 | 0.82 | 3.79 | 8340  |
| 22.65 | 25303.05 | 1.03 | 0.82 | 6.12 | 13682 |
| 23.71 | 24713.77 | 0.99 | 0.85 | 6.16 | 13390 |
| 24.76 | 24574.47 | 1.12 | 0.96 | 6.17 | 11842 |
| 25.85 | 13752.34 | 0.98 | 0.77 | 3.46 | 7852  |
| 26.95 | 19523.88 | 0.99 | 0.94 | 5.88 | 10123 |
| 28.02 | 29085.64 | 1.74 | 1.58 | 7.35 | 8758  |
| 29.07 | 23857.76 | 1.77 | 1.53 | 5.82 | 7239  |
| 30.11 | 18618.81 | 1.36 | 1.20 | 4.74 | 7269  |
| 31.25 | 5523.76  | 1.89 | 1.68 | 1.47 | 1550  |
| 32.36 | 27589.09 | 1.25 | 1.18 | 6.95 | 11325 |
| 33.41 | 25361.14 | 1.44 | 1.22 | 6.75 | 9524  |
| 34.45 | 20177.16 | 1.77 | 1.49 | 5.16 | 6194  |
| 35.46 | 19716.64 | 1.42 | 1.20 | 5.06 | 7519  |
| 36.50 | 10678.95 | 1.41 | 1.21 | 2.77 | 4083  |

Continued

---

| Depth (mbsf)  | Methane (ppm) | Ethane (ppm) | Propane (ppm) | Methane (mM) | C <sub>1</sub> /(C <sub>2</sub> +C <sub>3</sub> ) |
|---------------|---------------|--------------|---------------|--------------|---------------------------------------------------|
| <b>M0090D</b> |               |              |               |              |                                                   |
| 0.51          | 53.21         | 0.14         | 0.07          | 0.01         | 246                                               |
| 1.36          | 90.81         | 0.20         | 0.11          | 0.03         | 290                                               |
| 2.37          | 63.34         | 0.14         | 0.06          | 0.02         | 310                                               |
| 3.38          | 306.13        | 0.17         | 0.07          | 0.07         | 1315                                              |
| 4.38          | 1175.10       | 0.20         | 0.11          | 0.28         | 3787                                              |
| 5.39          | 3656.40       | 0.17         | 0.09          | 0.87         | 14023                                             |
| 6.44          | 6731.70       | 0.19         | 0.10          | 1.58         | 23451                                             |
| 7.45          | 839.87        | 0.08         | 0.05          | 0.20         | 6328                                              |
| 8.47          | 10254.30      | 0.20         | 0.10          | 2.39         | 34274                                             |
| 9.51          | 9514.64       | 0.19         | 0.12          | 2.31         | 30630                                             |
| 10.52         | 9234.06       | 0.18         | 0.13          | 2.24         | 29785                                             |
| 11.53         | 11290.26      | 0.22         | 0.14          | 2.61         | 31387                                             |
| 12.54         | 11173.40      | 0.18         | 0.11          | 2.57         | 38372                                             |
| 13.59         | 6399.23       | 0.16         | 0.11          | 1.57         | 23601                                             |
| 14.60         | 6792.13       | 0.18         | 0.13          | 1.67         | 21861                                             |
| 15.66         | 5017.25       | 0.15         | 0.10          | 1.37         | 20057                                             |
| 16.72         | 15205.46      | 0.21         | 0.13          | 3.60         | 43760                                             |
| 17.77         | 5070.40       | 0.19         | 0.11          | 1.26         | 16825                                             |
| 18.84         | 22851.42      | 0.26         | 0.17          | 5.60         | 53163                                             |
| 19.92         | 16903.20      | 0.22         | 0.14          | 4.03         | 46681                                             |
| 20.97         | 20770.65      | 0.27         | 0.20          | 5.07         | 44229                                             |
| 22.01         | 21923.07      | 0.24         | 0.15          | 5.28         | 55957                                             |
| 23.06         | 3618.06       | 0.16         | 0.11          | 0.90         | 13495                                             |

Continued

|       |          |      |      |      |       |
|-------|----------|------|------|------|-------|
| 24.12 | 27079.45 | 0.28 | 0.17 | 6.72 | 60808 |
| 25.19 | 24376.38 | 0.24 | 0.16 | 6.20 | 60368 |
| 26.24 | 11115.55 | 0.22 | 0.17 | 2.80 | 28666 |
| 27.28 | 21330.15 | 0.26 | 0.18 | 5.20 | 48504 |
| 28.34 | 4820.56  | 0.18 | 0.15 | 1.20 | 14938 |
| 29.39 | 22402.14 | 0.28 | 0.19 | 5.62 | 48317 |
| 30.44 | 23396.06 | 0.33 | 0.26 | 5.83 | 39909 |
| 31.48 | 11923.23 | 0.26 | 0.19 | 2.98 | 26638 |
| 32.52 | 18031.25 | 0.30 | 0.25 | 4.53 | 32551 |
| 33.56 | 14295.70 | 0.30 | 0.23 | 3.77 | 26579 |

---

| Depth (mbsf) | Methane (ppm) | Ethane (ppm) | Propane (ppm) | Methane (mM) | C <sub>1</sub> /(C <sub>2</sub> +C <sub>3</sub> ) |
|--------------|---------------|--------------|---------------|--------------|---------------------------------------------------|
|--------------|---------------|--------------|---------------|--------------|---------------------------------------------------|

**M0091D**

|       |        |      |      |      |     |
|-------|--------|------|------|------|-----|
| 0.25  | 120.82 | 0.42 | 0.32 | 0.03 | 162 |
| 1.27  | 152.71 | 0.52 | 0.42 | 0.04 | 162 |
| 2.28  | 86.86  | 0.35 | 0.26 | 0.02 | 143 |
| 3.28  | 276.12 | 0.74 | 0.60 | 0.07 | 205 |
| 4.29  | 237.00 | 0.49 | 0.37 | 0.06 | 275 |
| 5.30  | 385.08 | 0.73 | 0.57 | 0.10 | 295 |
| 6.30  | 151.61 | 0.44 | 0.27 | 0.04 | 214 |
| 7.31  | 153.04 | 0.55 | 0.45 | 0.04 | 153 |
| 8.32  | 129.14 | 0.45 | 0.35 | 0.03 | 162 |
| 9.33  | 119.37 | 0.38 | 0.27 | 0.03 | 184 |
| 10.34 | 165.12 | 0.39 | 0.29 | 0.04 | 243 |
| 11.34 | 201.52 | 0.39 | 0.28 | 0.05 | 299 |
| 12.35 | 392.05 | 0.44 | 0.34 | 0.10 | 501 |

Continued

---

|       |          |      |      |      |       |
|-------|----------|------|------|------|-------|
| 13.36 | 632.08   | 0.38 | 0.28 | 0.16 | 955   |
| 14.38 | 1279.94  | 0.60 | 0.53 | 0.32 | 1134  |
| 15.39 | 1415.96  | 0.72 | 0.63 | 0.35 | 1049  |
| 16.40 | 2141.26  | 0.64 | 0.57 | 0.53 | 1777  |
| 17.41 | 2371.86  | 0.46 | 0.37 | 0.59 | 2849  |
| 18.42 | 3771.78  | 0.65 | 0.56 | 0.94 | 3121  |
| 19.43 | 3531.08  | 0.47 | 0.37 | 0.87 | 4222  |
| 20.44 | 6712.57  | 0.56 | 0.44 | 1.71 | 6722  |
| 21.45 | 7351.50  | 0.71 | 0.60 | 1.87 | 5648  |
| 22.46 | 9751.88  | 0.52 | 0.41 | 2.40 | 10489 |
| 23.48 | 9116.11  | 0.78 | 0.67 | 2.28 | 6306  |
| 24.51 | 10900.34 | 0.71 | 0.57 | 2.73 | 8545  |
| 25.55 | 9889.71  | 0.47 | 0.36 | 2.43 | 11955 |
| 26.61 | 15149.57 | 0.49 | 0.38 | 3.71 | 17445 |
| 27.65 | 13656.73 | 0.76 | 0.59 | 3.36 | 10055 |
| 28.74 | 17242.11 | 0.79 | 0.72 | 4.37 | 11425 |
| 29.80 | 17219.38 | 0.68 | 0.55 | 4.43 | 14081 |
| 30.86 | 14798.68 | 0.75 | 0.69 | 3.64 | 10255 |

---

| <b>Depth (mbsf)</b> | <b>Methane (ppm)</b> | <b>Ethane (ppm)</b> | <b>Propane (ppm)</b> | <b>Methane (mM)</b> | <b>C<sub>1</sub>/(C<sub>2</sub>+C<sub>3</sub>)</b> |
|---------------------|----------------------|---------------------|----------------------|---------------------|----------------------------------------------------|
|---------------------|----------------------|---------------------|----------------------|---------------------|----------------------------------------------------|

**M0092D**

|      |        |      |      |      |     |
|------|--------|------|------|------|-----|
| 0.87 | 131.64 | 0.39 | 0.30 | 0.03 | 191 |
| 1.88 | 308.92 | 0.68 | 0.56 | 0.07 | 249 |
| 2.89 | 397.34 | 0.71 | 0.56 | 0.10 | 313 |
| 3.90 | 243.44 | 0.54 | 0.44 | 0.06 | 249 |
| 4.91 | 296.01 | 0.52 | 0.43 | 0.07 | 311 |

Continued

---

|       |          |      |      |      |       |
|-------|----------|------|------|------|-------|
| 5.91  | 309.55   | 0.38 | 0.28 | 0.08 | 471   |
| 6.92  | 472.79   | 0.35 | 0.27 | 0.12 | 753   |
| 7.93  | 808.50   | 0.44 | 0.35 | 0.20 | 1020  |
| 8.94  | 1872.80  | 0.47 | 0.36 | 0.44 | 2254  |
| 9.94  | 2703.50  | 0.74 | 0.66 | 0.65 | 1921  |
| 10.94 | 4459.51  | 0.59 | 0.44 | 1.05 | 4355  |
| 11.95 | 5359.40  | 0.81 | 0.66 | 1.26 | 3624  |
| 12.96 | 6733.69  | 0.95 | 0.83 | 1.59 | 3770  |
| 13.97 | 8709.27  | 0.86 | 0.69 | 2.06 | 5628  |
| 14.97 | 7564.01  | 0.75 | 0.60 | 1.73 | 5609  |
| 15.99 | 10202.69 | 0.79 | 0.62 | 2.35 | 7248  |
| 17.02 | 13113.89 | 0.85 | 0.65 | 3.09 | 8741  |
| 18.04 | 12708.22 | 1.10 | 0.89 | 2.96 | 6393  |
| 19.09 | 8720.27  | 0.86 | 0.70 | 2.15 | 5583  |
| 20.12 | 15882.06 | 0.78 | 0.61 | 4.14 | 11456 |
| 21.17 | 16769.63 | 0.97 | 0.81 | 3.97 | 9429  |
| 22.21 | 15164.04 | 0.97 | 0.81 | 3.69 | 8493  |
| 23.27 | 19992.78 | 1.22 | 0.96 | 4.75 | 9199  |
| 24.32 | 24915.15 | 1.13 | 0.88 | 5.85 | 12359 |
| 25.35 | 18030.44 | 1.15 | 0.92 | 4.32 | 8720  |
| 26.41 | 24312.96 | 1.06 | 0.78 | 6.04 | 13211 |
| 27.45 | 26109.81 | 1.24 | 1.03 | 6.73 | 11492 |
| 28.48 | 21714.26 | 0.99 | 0.73 | 5.38 | 12660 |
| 29.54 | 20410.43 | 1.31 | 1.03 | 5.05 | 8702  |
| 30.60 | 8679.96  | 1.76 | 1.47 | 2.23 | 2683  |

Continued

---

|       |          |      |      |      |      |
|-------|----------|------|------|------|------|
| 31.66 | 24101.35 | 2.02 | 1.74 | 6.30 | 6424 |
| 32.69 | 19356.80 | 1.74 | 1.56 | 5.00 | 5857 |
| 33.75 | 20236.38 | 2.05 | 1.69 | 5.12 | 5411 |
| 34.81 | 15381.45 | 1.58 | 1.33 | 3.78 | 5283 |
| 35.86 | 12082.66 | 1.89 | 1.68 | 3.17 | 3384 |

---

| Depth (mbsf) | Methane (ppm) | Ethane (ppm) | Propane (ppm) | Methane (mM) | C <sub>1</sub> /(C <sub>2</sub> +C <sub>3</sub> ) |
|--------------|---------------|--------------|---------------|--------------|---------------------------------------------------|
|--------------|---------------|--------------|---------------|--------------|---------------------------------------------------|

**M0093B**

|       |          |      |      |      |       |
|-------|----------|------|------|------|-------|
| 0.48  | 174.53   | 0.28 | 0.21 | 0.04 | 352   |
| 1.48  | 61.53    | 0.19 | 0.11 | 0.01 | 206   |
| 2.49  | 119.30   | 0.19 | 0.14 | 0.03 | 365   |
| 3.50  | 126.97   | 0.24 | 0.18 | 0.03 | 304   |
| 4.50  | 131.68   | 0.25 | 0.18 | 0.04 | 307   |
| 5.51  | 158.80   | 0.28 | 0.20 | 0.05 | 331   |
| 6.52  | 79.73    | 0.22 | 0.15 | 0.02 | 214   |
| 8.53  | 512.08   | 0.53 | 0.45 | 0.14 | 524   |
| 9.54  | 576.90   | 0.56 | 0.51 | 0.16 | 535   |
| 10.54 | 1183.96  | 0.90 | 0.86 | 0.35 | 674   |
| 11.54 | 1232.15  | 0.93 | 0.93 | 0.40 | 662   |
| 12.55 | 1019.92  | 0.86 | 0.80 | 0.31 | 617   |
| 13.56 | 675.71   | 0.84 | 0.91 | 0.20 | 386   |
| 14.57 | 755.84   | 0.59 | 0.54 | 0.21 | 674   |
| 15.57 | 1242.15  | 0.62 | 0.58 | 0.39 | 1032  |
| 16.58 | 3275.59  | 0.79 | 0.79 | 0.98 | 2073  |
| 17.59 | 4983.86  | 0.84 | 0.92 | 1.47 | 2823  |
| 18.61 | 10570.46 | 0.34 | 0.28 | 2.63 | 17109 |

Continued

---

|       |          |      |      |      |       |
|-------|----------|------|------|------|-------|
| 19.63 | 7884.28  | 0.43 | 0.37 | 2.14 | 9890  |
| 20.67 | 6649.73  | 0.28 | 0.21 | 1.67 | 13551 |
| 21.73 | 18080.59 | 0.23 | 0.15 | 4.34 | 47748 |
| 22.76 | 15799.70 | 0.84 | 1.00 | 4.20 | 8575  |
| 23.83 | 8078.01  | 0.29 | 0.23 | 2.03 | 15440 |
| 24.90 | 8140.27  | 0.41 | 0.39 | 2.14 | 10148 |
| 25.96 | 8380.37  | 0.25 | 0.19 | 2.14 | 18871 |

---

| Depth (mbsf) | Methane (ppm) | Ethane (ppm) | Propane (ppm) | Methane (mM) | C <sub>1</sub> /(C <sub>2</sub> +C <sub>3</sub> ) |
|--------------|---------------|--------------|---------------|--------------|---------------------------------------------------|
|--------------|---------------|--------------|---------------|--------------|---------------------------------------------------|

**M0095B**

|       |          |      |      |      |       |
|-------|----------|------|------|------|-------|
| 1.27  | 18.00    | 0.10 | 0.05 | 0.00 | 118   |
| 2.27  | 30.05    | 0.09 | 0.07 | 0.01 | 183   |
| 3.28  | 42.92    | 0.11 | 0.08 | 0.01 | 225   |
| 4.28  | 41.86    | 0.09 | 0.07 | 0.01 | 265   |
| 5.29  | 83.54    | 0.10 | 0.08 | 0.02 | 485   |
| 6.29  | 425.74   | 0.11 | 0.09 | 0.11 | 2113  |
| 7.29  | 1390.83  | 0.12 | 0.10 | 0.34 | 6308  |
| 8.31  | 2803.71  | 0.12 | 0.09 | 0.66 | 13162 |
| 9.31  | 4756.80  | 0.14 | 0.09 | 1.14 | 20163 |
| 10.32 | 5596.35  | 0.15 | 0.09 | 1.31 | 23192 |
| 11.33 | 7391.13  | 0.17 | 0.11 | 1.74 | 26310 |
| 12.34 | 8054.22  | 0.19 | 0.09 | 1.89 | 27953 |
| 13.34 | 10508.71 | 0.18 | 0.12 | 2.51 | 34420 |
| 14.37 | 12850.46 | 0.19 | 0.12 | 2.99 | 42014 |
| 15.40 | 12887.53 | 0.20 | 0.12 | 3.07 | 39662 |
| 16.45 | 11286.13 | 0.19 | 0.13 | 2.65 | 35289 |

Continued

---

|       |          |      |      |      |       |
|-------|----------|------|------|------|-------|
| 17.50 | 13278.03 | 0.19 | 0.11 | 3.21 | 44181 |
| 18.54 | 19355.96 | 0.22 | 0.14 | 4.53 | 53554 |
| 19.61 | 21836.10 | 0.26 | 0.16 | 5.13 | 52140 |
| 20.66 | 17704.21 | 0.23 | 0.14 | 4.19 | 48052 |
| 21.71 | 22266.47 | 0.25 | 0.14 | 5.16 | 57209 |
| 22.78 | 13630.07 | 0.20 | 0.10 | 3.24 | 45467 |
| 23.86 | 21312.78 | 0.23 | 0.12 | 5.01 | 61466 |
| 24.90 | 18440.35 | 0.20 | 0.11 | 4.37 | 59028 |
| 25.91 | 19054.28 | 0.18 | 0.11 | 4.75 | 64270 |
| 26.92 | 19212.35 | 0.21 | 0.14 | 4.65 | 55164 |
| 27.95 | 8191.22  | 0.16 | 0.11 | 1.99 | 30693 |

---



**Supplementary Table 10.** BW DOC data of Holes M0081C, M0083C and M0084C used in Supplementary Fig. 1.

| Hole   | $\delta^{13}\text{C}_{\text{DOC}}$ (‰) | $\Delta^{14}\text{C}_{\text{DOC}}$ (‰) |
|--------|----------------------------------------|----------------------------------------|
| M0081C | -29.82                                 | -516.22                                |
| M0083C | -25.90                                 | -504.23                                |
| M0084C | -26.03                                 | -508.07                                |

### Supplementary references

1. Shan, S. *et al.* Carbon cycling in the deep Mariana Trench in the western north Pacific Ocean: Insights from radiocarbon proxy data. *Deep. Res. Part I Oceanogr. Res. Pap.* **164**, 103370 (2020).
2. Ishiwatari, R. *et al.* Source of Organic Matter in Sinking Particles in the Japan Trench: Molecular Composition and Carbon Isotopic Analyses. in *Dynamics and Characterization of Marine Organic Matter* 141–168 (2000).
3. Schwestermann, T. *et al.* Event-dominated transport, provenance, and burial of organic carbon in the Japan Trench. *Earth Planet. Sci. Lett.* **563**, 116870 (2021).
4. Bao, R. *et al.* Tectonically-triggered sediment and carbon export to the Hadal zone. *Nat. Commun.* **9**, 121 (2018).
5. McCorkle, D. C. & McNichol, A. P. The Stable Carbon Isotopic Composition of the Oceans. in *Encyclopedia of Ocean Sciences* 329–332 (Elsevier, 2019).
6. Wegener, G., Niemann, H., Elvert, M., Hinrichs, K. U. & Boetius, A. Assimilation of methane and inorganic carbon by microbial communities mediating the anaerobic oxidation of methane. *Environ. Microbiol.* **10**, 2287–2298 (2008).
7. Bradbury, H. J. & Turchyn, A. V. Reevaluating the carbon sink due to sedimentary carbonate formation in modern marine sediments. *Earth Planet. Sci. Lett.* **519**, 40–49 (2019).
8. Pohlman, J. W., Bauer, J. E., Waite, W. F., Osburn, C. L. & Chapman, N. R. Methane hydrate-bearing seeps as a source of aged dissolved organic carbon to the oceans. *Nat. Geosci.* **4**, 37–41 (2011).
9. Aleksandra, B. & Katarzyna, Ł.-M. Porewater dissolved organic and inorganic

carbon in relation to methane occurrence in sediments of the Gdańsk Basin (southern Baltic Sea). *Cont. Shelf Res.* **168**, 11–20 (2018).

10. Whiticar, M. J. Carbon and hydrogen isotope systematics of bacterial formation and oxidation of methane. *Chem. Geol.* **161**, 291–314 (1999).
