# Supplementary material for: Earthquake-enhanced dissolved carbon cycles in ultra-deep ocean sediments
Source: Springer Nature journal article supplement (doi:10.1038/s41467-023-41116-w), 2023-09-11
Supplement: MOESM4 [file 41467_2023_41116_MOESM4_ESM.xlsx]

## Sheet: Fig. 1
Depth (mbsf)	Alkalinity (mM)	SO42- (mM)	Depth (mbsf)	Alkalinity (mM)	SO42- (mM)	Depth (mbsf)	Alkalinity (mM)	SO42- (mM)		Depth (mbsf)	Methane (ppm)	Ethane (ppm)	Propane (ppm)	methane (mM)	C1/(C2+C3)
M0081D			M0082D			M0083D				M0081F
BW	2.5294	28.8027	0.4		21.0905	BW	2.6078	28.2054		1.07	135.613	0.489316	0.366317	0.0311118	158.494
0.175	17.7024	20.1165	0.9	30.9305	12.9815	0.27	24.6756	16.5283		2.02	161.869	0.624598	0.47909	0.0378105	146.662
0.675	8.2237	26.3836	1.405	37.8781	9.01647	1.06	33.0486	11.7034		3.03	216.162	0.611301	0.508528	0.0517389	193.031
1.175	25.6425	16.0009	1.905	44.4491	5.89045	1.56	37.0351	9.67643		4.05	150.864	0.436106	0.338536	0.0358039	194.754
1.685	32.497	12.3166	2.415	48.2313	3.65009	2.06	39.5791	8.15078		5.06	149.425	0.528281	0.439448	0.0359058	154.408
2.185	40.0227	8.26323	2.915	52.3371	2.11651	2.57	42.1021	6.97739		6.06	225.022	0.517761	0.426941	0.0552832	238.194
2.69	43.3588	6.66963	3.43	54.9453	1.00075	3.07	44.225	5.90062		7.075	227.257	0.537721	0.44271	0.0623734	231.793
3.19	47.0573	5.00601	3.93	56.0794	0.463758	3.58	45.229	5.32125		8.085	476.09	0.470687	0.354632	0.115336	576.856
3.69	49.9072	3.77963	4.44	57.8971	0.147203	4.08	46.6179	4.56987		9.09	778.927	0.538971	0.424283	0.185251	808.642
4.19	50.9749	3.19981	4.94	59.252	0.0420641	5.095	48.5881	3.6206		10.095	1268	0.703855	0.586049	0.312816	983.019
4.695	53.4298	2.65434	5.945	62.1915	0.133415	6.105	49.9073	2.96766		11.105	2272.1	0.543711	0.425078	0.561489	2345.29
5.7	56.5302	1.53082	6.95	63.691	0.285888	7.115	50.1129	2.89616		12.115	3825.65	0.595367	0.499725	0.946568	3493.45
6.705	59.0372	2.76128	7.96	65.0078	0.0928312	8.125	50.5504	2.62327		13.125	6123.59	0.699939	0.59414	1.51254	4732
7.71	56.8458	0.614778	8.99	66.3034	0.219643	9.135	50.0933	2.46022		14.13	8246.61	0.727485	0.633096	2.00067	6061.09
8.72	60.3998	0.404432	10.01	66.6139	0.351444	10.145	50.2027	2.29798		15.15	4010.07	0.559522	0.450341	0.933026	3970.9
9.725	60.6912	0.27773	12.04	69.409	0.156868	12.155	53.4602	0.832259		16.2	7343.16	0.618468	0.520256	1.74271	6448.59
11.735	64.1262	0.40481	14.1	70.7418	0.145561	14.185	57.6092	0.444386		17.245	11736.9	0.652814	0.542655	2.87406	9817.84
13.75	66.7892	0.905805	16.285	71.3699	0.104175	16.23	56.4448	1.16916		18.29	8461.78	0.622292	0.485914	2.04918	7635.57
15.85	70.292	0.387189	18.345	71.3866	0.146144	18.31	62.5983	0.279709		19.335	10775.9	0.555557	0.457867	2.62091	10633.1
17.865	72.1382	0.256769	20.335	71.4703	0.252895	20.33	64.9372	0.201852		20.395	8044.3	0.510914	0.416815	1.92337	8670.96
19.985	72.1908	0.47686	22.415	71.4735	0.0580571	22.48	65.8404	0.209046		21.445	5887.26	0.558914	0.463099	1.424	5760.46
22.085	72.7397	0.343879	24.5	72.4231	0.0123803	24.515	66.2425	0.459999		22.495	10733.8	0.646154	0.566358	2.52542	8852.56
24.17	72.3876	0.225148	26.64	70.9483	0.262051	26.565	66.5537	0.0503118		23.585	12808.4	0.531657	0.451692	3.08291	13025.3
26.245	75.1272	0.236086	28.82	70.7288	0.200342	28.59	67.3081	0.136624		24.68	7771.12	0.853749	0.814615	2.0233	4657.93
28.29	73.2835	0.258599	30.835	70.2568	0.110077	30.975	68.0069	0.0226934		25.765	6963.16	0.834133	0.751257	1.84388	4392.08
30.31	73.6102	0.374342	33.07	71.2649	0.0208617	33.055	69.4893	0.014073		26.825	6292.99	0.697785	0.58407	1.36221	4909.28
32.32	73.426	0.209456	35.12	70.9921		35.075	71.9173	0.0397838		27.89	16804.9	0.636285	0.537927	4.04437	14311.6
34.345	72.0294	0.322321								28.94	10471.4	0.562443	0.462391	2.55673	10217.7
Depth (mbsf)	Alkalinity (mM)	SO42- (mM)	Depth (mbsf)	Alkalinity (mM)	SO42- (mM)	Depth (mbsf)	Alkalinity (mM)	SO42- (mM)		30.035	22096.8	0.61392	0.514801	5.44197	19576.8
M0084D			M0086B			M0088D				31.115	21046.3	0.48035	0.416539	5.18325	23465.9
BW	2.7	28.392	0.105	16.6758	21.2557	0.45	25.8905	16.6094		32.165	6398.92	0.834036	0.716054	1.55992	4128.1
0.35	13.4239	23.0357	0.605	17.0647	21.373	0.95	33.647	12.5276		33.215	17547.8	0.396505	0.297323	4.45099	25291.3
0.85	23.4996	17.6696	1.1	30.0134	14.2674	1.515	37.8786	10.2943		34.225	23556.6	0.923108	0.794075	5.96836	13718.1
1.37	30.3686	14.9176	1.6	31.6747	12.7018	2.015	41.1574	8.4668		35.235	12541.7	0.810444	0.690294	3.2973	8357.01
1.995	35.6987	12.2126	2.115	32.5757	12.0468	2.52	44.8092	6.47		36.245	20261.7	0.951847	0.911714	5.38876	10872.6
2.36	37.3681	11.5473	2.615	33.9445	10.5127	3.02	48.1205	4.48872		37.285	13158.7	0.932076	0.845653	3.3185	7401.95
2.735	38.9678	10.7175	3.115	35.9087	10.3043	3.53	51.1225	3.57477		Depth (mbsf)	Methane (ppm)	Ethane (ppm)	Propane (ppm)	methane (mM)	C1/(C2+C3)
3.365	40.9358	9.74044	3.615	37.762	9.02804	4.03	54.6182	1.36023		M0082D
4.375	46.771	6.2987	4.125	39.3354	8.11919	4.535	57.5442	0.350745		1.055	119.095	0.340708	0.275585	0.0285634	193.244
5.515	53.4456	3.05795	4.625	41.1985	7.31595	5.035	59.3038	0.0912713		2.065	188.298	0.361221	0.299868	0.053134	284.83
6.565	60.1489	0.319884	5.625	44.778	5.69229	6.06	61.9036	0.158166		3.08	317.573	0.41191	0.306203	0.0767589	442.233
7.575	62.677	0.251266	6.635	12.1955	23.2256	7.15	64.3873	0.152158		4.09	1328.18	0.497703	0.403702	0.321182	1473.46
8.585	65.8417	0.10358	7.64	50.9946	2.98683	8.15	67.1313	0.126314		5.095	3543.37	0.850877	0.778363	0.887943	2174.86
9.595	69.1997	0.336374	8.645	54.8718	1.49683	9.16	68.6054	0.117897		6.1	5728.28	0.599466	0.498741	1.33527	5216.03
11.67	74.9483	0.140813	9.655	57.5467	0.555111	10.165	69.6699	0.145242		7.11	8147.69	0.471289	0.395509	1.89464	9399.75
13.69	81.2345	0.132731	10.67	59.3688	0.314437	12.175	73.1417	0.463593		8.12	8409.59	0.545184	0.460811	1.99933	8359.47
15.715	85.9708	0.153387	12.7	62.4502	0.240862	14.185	79.2699	0.264045		9.14	13561	0.49499	0.4274	3.22139	14702
17.745	92.1867	0.0516369	14.745	64.76	0.0932762	16.2	82.858	0.172457		10.165	10317.8	0.439618	0.368984	2.40232	12760.1
19.755	94.1237	0.278583	16.785	67.1593	0.0700038	18.26	88.3556	0.163526		11.19	17650.2	0.313426	0.247011	4.46014	31493.6
21.775	96.4492	0.240297				20.23	92.5934	0.103155		12.205	14418.1	0.645801	0.575296	3.53277	11807.5
23.79	97.8554	0.117341				22.265	92.9025	0.146623		13.22	11600.5	0.613883	0.517707	2.77562	10251.5
25.79	94.5015	0.0751166				24.32	97.0665	0.119273		14.255	14704	0.441697	0.323356	3.45547	19219.6
27.825	95.383					26.37	96.1407	0.0647567		15.295	12098.2	0.654416	0.550523	2.7642	10040.5
29.825	88.6122	0.0148457				28.38	95.1565	0.117379		16.34	16831.1	0.480054	0.390273	4.14262	19338.8
31.895	84.7444					30.205	92.5017			17.355	14364	0.642978	0.552035	3.40213	12019.9
33.91	79.4855	0.0142638				32.755	88.8316			18.4	20713.7	0.729715	0.635551	4.71185	15171.9
						34.765	85.9032			19.435	5330.24	0.641202	0.544244	1.24594	4496.4
Depth (mbsf)	Alkalinity (mM)	SO42- (mM)	Depth (mbsf)	Alkalinity (mM)	SO42- (mM)	Depth (mbsf)	Alkalinity (mM)	SO42- (mM)		20.49	12990.4	1.07124	0.922551	2.99964	6515.4
M0089D			M0090D			M0091D				21.545	17219.2	0.753986	0.641129	4.01985	12342.5
0.35	11.5125	23.3912	0.35	21.4753	16.9347	0.1	7.6314	25.841		22.565	18374.3	0.590367	0.509314	4.33213	16708.8
0.85	20.5641	17.4907	0.705	21.2957	16.7976	0.6	11.9387	22.5091		23.6	9485.97	0.843733	0.765159	2.31696	5895.96
1.355	24.765	14.386	1.205	30.3075	10.8364	1.1	18.7012	19.8015		24.655	17699.5	0.809182	0.700082	4.23342	11727.3
1.855	29.6063	11.8392	1.71	34.9934	7.77402	1.615	22.1806	17.1393		25.71	4769.92	0.808478	0.677349	1.18544	3210.28
2.365	31.4516	10.3248	2.21	39.3716	4.94824	2.115	26.1281	15.4521		26.8	20263.1	0.801223	0.704746	5.05019	13455.2
2.865	33.4069	8.99569	2.715	41.0559	3.98049	2.625	27.2915	14.8236		27.91	24402.7	1.09901	0.993872	5.84086	11659.9
3.375	36.0584	7.75508	3.215	44.2298	2.36784	3.125	29.5575	13.4703		28.97	21699.7	0.906889	0.764011	5.17912	12986.8
3.875	37.537	6.35083	3.725	47.1777	1.06129	3.63	31.5514	12.4427		30.035	16081.2	0.555299	0.471993	3.9331	15654
4.385	39.2325	5.21756	4.225	47.9855	0.563021	4.13	34.2616	10.9882		31.115	5621.42	0.916113	0.773658	1.36477	3326.73
4.885	41.2053	3.60517	5.23	51.4834	0.153924	5.14	38.2183	9.52529		32.17	20247.5	0.660848	0.57988	4.89508	16319
5.895	46.7401	1.56867	6.235	52.822	0.14647	6.145	40.8454	8.37985		33.225	19858.6	0.780355	0.655476	4.96655	13830.7
6.9	48.9042	0.562811	7.3	53.5713	0.484234	7.15	41.9556	7.74752		34.24	16370.8	0.843106	0.6898	3.89711	10679.6
7.91	50.7322	0.147786	8.32	55.0762	0.3475	8.16	42.7479	7.10043		35.285	14348.4	0.86484	0.684813	3.50207	9259.13
8.92	51.8443	0.159558	9.36	50.8311	2.62556	9.165	45.0982	5.90989		36.345	10149.2	0.98016	0.787789	2.49283	5740.66
9.93	53.6094	0.215432	11.375	58.8586	0.346468	11.185	51.5204	2.73897		Depth (mbsf)	Methane (ppm)	Ethane (ppm)	Propane (ppm)	methane (mM)	C1/(C2+C3)
11.96	55.1227	0.207909	13.435	61.2061	0.200962	13.21	60.484	0.309703		M0083D
14.005	57.7679	0.106254	15.505	63.6117	0.0942973	15.235	63.2018	0.406831		0.41	260.223	0.800884	0.649316	0.0617792	179.439
16.115	59.102	0.0902111	17.535	64.8616	0.0817179	17.25	64.6578	0.302586		1.21	515.911	0.986678	0.777253	0.129994	292.478
18.22	61.058	0.14017	19.765	65.8208	0.241067	19.28	67.3116	0.0603661		2.22	376.506	0.731234	0.578151	0.0966924	287.544
20.33	62.0666	0.0489247	21.855	67.6232	0.155384	21.3	68.2916	0.117627		3.23	263.785	0.484476	0.364306	0.0673578	310.78
22.48	64.2649	0.198459	23.97	69.5522	0.147461	23.32	68.1402	0.250476		4.245	369.341	0.711632	0.540497	0.0946114	294.97
24.6	65.2929	0.226341	26.095	67.8506	0.00790686	25.305	68.8641	0.250325		5.255	411.778	0.835502	0.644648	0.104949	278.201
26.795	66.0692	0.255245	28.22	70.1169		27.5	69.3334	0.226725		6.265	374.673	0.733408	0.56851	0.0977905	287.786
28.915	66.2835	0.011882	30.295	70.3749		29.65	67.7155	0.669687		7.275	286.324	0.747417	0.589796	0.0705672	214.12
31.095	67.7841	0.00913986	32.385	70.8143						8.285	399.19	0.810885	0.627449	0.0970909	277.536
33.26	68.5041									9.295	1647.49	0.433184	0.327955	0.392562	2164.51
35.31	69.2676									10.3	2874.64	0.453446	0.322753	0.72144	3703.48
Depth (mbsf)	Alkalinity (mM)	SO42- (mM)	Depth (mbsf)	Alkalinity (mM)	SO42- (mM)	Depth (mbsf)	Alkalinity (mM)	SO42- (mM)		11.305	4465.27	0.531135	0.383512	1.11799	4881.96
M0092D			M0093B			M0095B				12.31	4708.52	0.460023	0.34187	1.18286	5871.75
0.21	7.0725	25.419	0.33	18.1905	20.2206	0.605	17.6935	18.4584		13.325	6240.15	0.655521	0.482417	1.59162	5483.73
0.71		20.4801	0.825	22.7338	18.2557	1.105	24.6575	14.8657		14.34	9989.43	0.525777	0.346839	2.34235	11447.7
1.225	23.8759	15.3985	1.325	24.9803	17.1276	1.615	28.9945	12.4843		15.37	5943.35	1.99988	2.09048	1.40538	1453.02
1.725	27.8185	13.5796	1.825	29.3279	14.9681	2.115	32.3679	10.4292		16.435	5963.29	2.34387	2.46838	1.52563	1239.19
2.23	31.713	11.204	2.325	31.3036	13.8387	2.62	36.7093	8.27864		17.445	8857.46	2.25354	2.40546	2.41428	1901.15
2.73	34.5617	9.36116	2.835	32.688	13.3933	3.12	39.3708	6.45509		18.47	5689.59	0.997487	0.981788	1.36929	2874.58
3.24	37.2137	7.81537	3.335	35.0591	11.9665	3.625	42.2798	5.13933		19.48	9900.06	2.74228	3.05357	2.64345	1708.13
3.74	39.0221	6.69871	3.845	36.7427	11.3038	4.125	44.4121	4.04437		20.56	5183.22	0.637936	0.557643	1.21186	4335.32
4.245	40.8593	5.81986	4.345	37.4049	11.4033	5.13	47.283	3.10503		21.63	19692.2	0.84453	0.705632	4.54613	12703.3
4.755	41.8787	4.95367	5.35	38.0361	11.1315	6.135	53.8412	0.261092		22.66	13225.5	1.01483	0.911203	3.14762	6866.71
5.755	43.9983	3.55795	6.355	37.748	11.0808	7.14	56.8877	0.20359		23.665	11043.9	0.569121	0.447513	2.5348	10863.2
6.77	47.4103	2.12005	7.365	36.9627	11.06	8.14	58.2228	0.0333634		24.675	17388.1	0.665875	0.532242	4.16931	14512.9
7.78	49.5196	0.653715	8.38	37.7267	10.3929	9.155	60.1093	0.0624785		25.715	10244.9	0.618861	0.51039	2.49147	9072.33
8.78	52.301	0.118568	9.38	37.9223	9.68472	10.16	60.7627	0.131371		26.735	18823.2	0.657037	0.515579	4.76552	16052.3
9.785	54.6799	0.066767	10.385	38.9764	8.43933	12.185	63.1049	0.0435711		27.74	18035.9	3.0724	3.58343	4.71411	2709.79
11.79	55.7898	0.0938704	12.39	45.192	4.54295	14.2	64.438	0.17249		28.745	12953.3	3.26665	3.88833	3.67521	1810.38
13.815	57.3255	0.687557	14.41	53.5483	1.12967	16.295	65.5259	0.253286		29.755	17284.9	0.89292	0.708682	4.11764	10792.3
15.835	57.6223	0.910042	16.42	53.4056	2.52439	18.385	65.8361	0.215218		31.115	10548.7	0.687467	0.565444	2.71841	8419.37
17.885	60.6873	0.117162	18.455	61.7315	0.242059	20.5	67.129	0.0263243		32.205	18177	1.30123	1.19821	4.57208	7272.42
19.96	60.4125	0.137931	20.51	63.7736	0.120434	22.625	68.7448			33.205	19256.9	0.916597	0.730859	4.77579	11688.8
22.045	59.0981	0.507899	22.605	65.8768	0.012509	24.745	69.069	0.00791969		34.225	21933.7	1.10399	0.897346	5.43498	10959.5
24.145	60.4939	0.014097	24.755	66.9719	0.0770009	26.76	69.0636	0.0413634		35.225	13750.4	0.745593	0.615613	3.46903	10101.7
26.245	59.7882	0.0136296								36.315	13207.5	1.12675	0.956962	3.29782	6338.42
28.33	55.5503									Depth (mbsf)	Methane (ppm)	Ethane (ppm)	Propane (ppm)	methane (mM)	C1/(C2+C3)
30.45	57.3992									M0084F
32.535	56.572									0.95	304.04	0.429735	0.308576	0.0707821	411.805
										1.885	544.777	0.387411	0.258504	0.12528	843.419
										2.415	256.348	0.456286	0.311218	0.0525415	334.002
										3.425	783.833	0.830226	0.651437	0.199547	529.022
										4.435	990.609	0.907613	0.708475	0.255902	612.967
										5.445	1963.63	0.971758	0.742138	0.509152	1145.71
										6.465	9186.69	0.897449	0.688308	2.29244	5793.25
										7.51	15351.8	0.917356	0.677111	3.68105	9628.17
										8.57	14747.9	0.982499	0.722644	3.52368	8649.09
										9.63	20474.1	0.910719	0.686632	4.9292	12817.6
										10.72	18852.5	0.845612	0.623228	4.46627	12834.9
										11.805	12258.5	0.992209	0.769239	2.97112	6959.32
										12.835	18241.5	0.775416	0.588816	4.39693	13371.3
										13.845	14421.4	0.939507	0.716753	3.51436	8707.22
										14.855	18717.7	0.996732	0.831895	4.71985	10235.9
										15.865	17324.1	0.967339	0.756989	4.25877	10046.9
										16.88	14953.7	0.891942	0.740873	4.25956	9158.23
										17.895	13150.5	0.92934	0.762273	3.39584	7773.96
										18.9	6924.64	1.66106	1.38937	1.91778	2270.06
										19.945	19696.9	0.397984	0.327919	4.30854	27134.3
										20.995	14540	0.46944	0.398513	3.44908	16752.1
										22.035	16415.3	0.652114	0.531128	3.77322	13873.1
										23.06	24660.5	0.580705	0.49528	5.36579	22919
										24.11	20711.5	0.465126	0.424068	4.65571	23292.5
										25.165	29633.4	0.404091	0.323727	6.70835	40715.4
										26.245	18779.6	0.720591	0.592848	4.04819	14298
										27.305	12464.1	0.805395	0.682344	2.95526	8377.88
										28.365	28997.2	0.468482	0.400363	6.53863	33374.4
										29.37	18898.1	0.387483	0.31684	4.31053	26831.7
										30.37	24938.2	0.517543	0.40629	6.07427	26994.3
										31.43	18934	0.596727	0.465744	4.42939	17820.7
										32.495	16576.1	0.45636	0.353719	3.96799	20462.3
										34.06	15148.2	0.664895	0.565683	3.77633	12309.8
										35.12	25917.6	0.862243	0.722079	6.16467	16358.8
										36.18	22840.6	0.518942	0.439632	5.63755	23827.7
										37.255	24873.9	0.777644	0.656292	6.16429	17346.6
										38.31	17948.2	0.676426	0.544149	4.51228	14704.7
										Depth (mbsf)	Methane (ppm)	Ethane (ppm)	Propane (ppm)	methane (mM)	C1/(C2+C3)
										M0086B
										0.75	186.015	0.569416	0.465345	0.0438366	179.766
										1.765	253.348	0.747475	0.609164	0.0604244	186.747
										2.765	237.966	0.769072	0.612609	0.056442	172.229
										3.775	176.386	0.683631	0.50569	0.0411157	148.308
										4.775	196.428	0.543736	0.418391	0.0466117	204.16
										5.785	761.923	1.83765	1.90094	0.185718	203.8
										6.79	160.092	0.502859	0.33229	0.0378557	191.693
										7.795	539.45	0.851844	0.675104	0.137506	353.286
										8.805	607.811	0.958324	0.795109	0.157297	346.641
										9.82	956.226	0.792912	0.600601	0.253181	686.198
										10.83	2794.71	0.887249	0.676222	0.712822	1787.5
										11.84	7007.41	0.989784	0.76785	1.77386	3986.84
										12.855	10731.4	0.789201	0.633924	2.69994	7540.69
										13.895	16965.1	0.70477	0.511278	4.30753	13951
										14.925	18677.7	0.9698	0.750537	4.97864	10857
										15.935	15181.2	0.506779	0.393264	4.11792	16867.2
										16.935	16653.4	0.874052	0.703081	4.81927	10559.3
										17.955	14476.5	0.666779	0.498901	4.33161	12418.9
										Depth (mbsf)	Methane (ppm)	Ethane (ppm)	Propane (ppm)	methane (mM)	C1/(C2+C3)
										M0088D
										1.1	138.862	0.460583	0.320222	0.0318971	177.845
										2.17	564.909	0.751051	0.634376	0.139568	407.751
										3.18	668.449	1.02873	0.796612	0.170884	366.204
										4.185	937.344	0.865996	0.693536	0.243514	601.042
										5.195	4555.71	0.971622	0.7436	1.17596	2656.04
										6.22	11504.4	1.06615	0.839085	2.82123	6038.3
										7.3	14106.4	0.380498	0.277444	3.46861	21440.2
										8.31	15518.8	0.661965	0.513536	3.85206	13201.9
										9.315	17517.9	1.1468	0.89528	4.22201	8578.44
										10.315	14495.2	0.510684	0.419769	3.48227	15578.6
										11.325	22379.9	0.614911	0.512218	5.31256	19855.7
										12.325	14351.3	0.882129	0.744194	3.41316	8824.4
										13.335	14323.1	0.758252	0.632069	3.36282	10302
										14.34	12689.7	1.77072	1.48279	3.48002	3900.33
										15.35	12728.8	0.242389	0.17967	2.8489	30158.8
										16.36	14302	0.569118	0.496933	3.17355	13415.9
										17.41	16379.4	0.528195	0.465386	3.71836	16485.2
										18.37	19154.6	0.455608	0.381504	4.32161	22881.7
										19.38	18628.4	0.58025	0.5282	4.0948	16805.8
										20.38	20176.4	0.43424	0.358337	4.37218	25456.7
										21.385	16824.1	0.938252	0.775013	3.81116	9819.9
										22.39	13888	0.297259	0.239939	3.16991	25852.7
										23.4	13851.9	0.35758	0.261595	3.14706	22371.5
										24.47	16752.7	0.460437	0.374565	3.81426	20063
										25.52	14154.5	0.526654	0.430795	3.26396	14783.5
										26.52	20269.8	0.641651	0.529272	4.6994	17311
										27.53	19588.5	0.447193	0.339733	4.78277	24892.4
										28.54	14898.1	0.99425	0.831541	3.35866	8159.83
										29.395	9250.76	0.799958	0.666533	2.10171	6308.09
										30.355	11461.8	0.650335	0.51379	2.58743	9845.83
										31.905	14528.4	0.63882	0.493501	3.69396	12830.7
										32.905	16053.1	0.625759	0.546697	3.94151	13691.9
										33.915	15191.4	0.621869	0.499063	3.74361	13552.5
										34.92	14616.2	0.764194	0.628832	3.69578	10492.4
										35.95	16230.9	0.709281	0.573449	3.83484	12653.4
										Depth (mbsf)	Methane (ppm)	Ethane (ppm)	Propane (ppm)	methane (mM)	C1/(C2+C3)
										M0089D
										1.005	119.317	0.44379	0.310286	0.0278194	158.23
										2.015	440.266	0.66993	0.552951	0.109081	360.024
										3.025	107.581	0.524963	0.397666	0.0250368	116.603
										4.035	203.326	0.576601	0.432443	0.0477931	201.503
										5.045	2766.88	3.42395	3.77434	0.804854	384.38
										6.05	331.496	0.51252	0.421461	0.0802491	354.928
										7.06	1215.15	0.597538	0.39771	0.294944	1220.95
										8.07	3241.6	0.651034	0.488166	0.769674	2845.5
										9.08	5278.7	0.577395	0.423777	1.24428	5272.53
										10.09	6759.82	0.610176	0.456148	1.60013	6339.37
										11.11	9489.57	0.889617	0.763159	2.31224	5741.59
										12.12	10268.9	1.66991	1.76982	2.63319	2985.39
										13.135	12341.3	0.933097	0.80502	3.01877	7100.41
										14.175	7368.08	0.57308	0.470681	1.93183	7059.17
										15.225	10536.5	0.786566	0.622889	2.55499	7475.6
										16.275	16855.8	0.993626	0.806297	4.17621	9364.73
										17.325	18290.8	1.52526	1.52933	4.37482	5987.96
										18.375	21555.7	0.957053	0.739074	5.17785	12708.8
										19.43	21168.2	0.963988	0.734033	5.12627	12466.4
										20.495	12035.1	0.614662	0.443462	2.94457	11374
										21.58	15697.2	1.05933	0.822755	3.79272	8340.32
										22.645	25303.1	1.0334	0.815949	6.11659	13682.1
										23.705	24713.8	0.993031	0.852699	6.15715	13389.7
										24.755	24574.5	1.1151	0.960125	6.17276	11841.8
										25.85	13752.3	0.98156	0.769935	3.4587	7851.77
										26.95	19523.9	0.990016	0.938662	5.87675	10122.9
										28.02	29085.6	1.73875	1.58213	7.34984	8758.42
										29.065	23857.8	1.7679	1.52786	5.81742	7238.92
										30.105	18618.8	1.36142	1.20005	4.73935	7268.81
										31.245	5523.76	1.88758	1.67721	1.47375	1549.54
										32.36	27589.1	1.25337	1.18268	6.95077	11325.3
										33.41	25361.1	1.44406	1.21885	6.74677	9523.83
										34.45	20177.2	1.76746	1.48998	5.16404	6194.19
										35.46	19716.6	1.41806	1.20419	5.05644	7518.97
										36.5	10678.9	1.40664	1.20882	2.76682	4083
										Depth (mbsf)	Methane (ppm)	Ethane (ppm)	Propane (ppm)	methane (mM)	C1/(C2+C3)
										M0090D
										0.505	53.2124	0.144069	0.0719663	0.0122931	246.313
										1.36	90.8109	0.200778	0.112199	0.0272287	290.152
										2.365	63.342	0.141987	0.0624441	0.0153634	309.844
										3.375	306.135	0.166795	0.0659438	0.0740119	1315.36
										4.38	1175.1	0.201834	0.108437	0.284674	3787.33
										5.385	3656.4	0.170787	0.089952	0.868674	14023.2
										6.44	6731.7	0.191848	0.0952002	1.58049	23451.5
										7.45	839.869	0.0840123	0.0487042	0.204273	6328.29
										8.47	10254.3	0.200422	0.0987618	2.39139	34274.3
										9.505	9514.64	0.188935	0.121692	2.31415	30630.4
										10.515	9234.06	0.182804	0.127222	2.24131	29784.7
										11.525	11290.3	0.217015	0.142695	2.61035	31387.1
										12.535	11173.4	0.176412	0.114775	2.57066	38371.9
										13.59	6399.23	0.164481	0.106656	1.57484	23601.5
										14.595	6792.13	0.184658	0.126037	1.67133	21861.1
										15.655	5017.25	0.151023	0.0991216	1.36534	20057.4
										16.715	15205.5	0.214661	0.132816	3.59552	43759.6
										17.765	5070.4	0.189847	0.111521	1.2637	16824.6
										18.835	22851.4	0.262017	0.167817	5.59979	53163.4
										19.915	16903.2	0.221895	0.140205	4.02624	46681
										20.965	20770.6	0.269529	0.200088	5.07079	44228.9
										22.01	21923.1	0.240449	0.151337	5.27803	55956.7
										23.06	3618.06	0.156282	0.11183	0.896084	13494.6
										24.12	27079.5	0.275299	0.170028	6.71749	60808.1
										25.185	24376.4	0.241503	0.162292	6.19787	60368.3
										26.24	11115.6	0.220612	0.167144	2.7966	28666.3
										27.28	21330.1	0.260176	0.179589	5.20235	48503.6
										28.335	4820.56	0.175413	0.147286	1.19552	14938.2
										29.385	22402.1	0.277895	0.185759	5.6236	48316.5
										30.435	23396.1	0.326481	0.259751	5.83174	39909.2
										31.475	11923.2	0.260642	0.186969	2.97973	26637.5
										32.515	18031.2	0.301077	0.252865	4.53089	32550.8
										33.56	14295.7	0.302894	0.234962	3.76679	26579
										Depth (mbsf)	Methane (ppm)	Ethane (ppm)	Propane (ppm)	methane (mM)	C1/(C2+C3)
										M0091D
										0.25	120.825	0.423523	0.323594	0.0287797	161.721
										1.265	152.711	0.522045	0.419598	0.0369108	162.175
										2.275	86.859	0.347539	0.258191	0.0210446	143.396
										3.28	276.116	0.742422	0.604345	0.0697562	205.022
										4.29	237.003	0.489528	0.371121	0.0608503	275.377
										5.295	385.084	0.733458	0.573912	0.0973337	294.548
										6.3	151.613	0.437223	0.272731	0.0374488	213.554
										7.31	153.036	0.552693	0.449918	0.0377632	152.637
										8.315	129.144	0.451088	0.346586	0.0339308	161.901
										9.33	119.366	0.375908	0.272275	0.0309824	184.155
										10.335	165.119	0.389508	0.289927	0.0439495	243.024
										11.34	201.516	0.390353	0.284283	0.0535524	298.703
										12.35	392.053	0.438702	0.344288	0.104064	500.712
										13.36	632.079	0.382057	0.279643	0.161239	955.234
										14.375	1279.94	0.603253	0.525379	0.319	1134.06
										15.385	1415.96	0.720734	0.629579	0.347915	1048.62
										16.4	2141.26	0.635334	0.569592	0.530455	1777.08
										17.41	2371.86	0.464608	0.368031	0.585857	2848.61
										18.42	3771.78	0.651274	0.557058	0.936572	3121.48
										19.43	3531.08	0.468619	0.367687	0.870908	4222.24
										20.44	6712.57	0.556711	0.441882	1.71363	6722.03
										21.45	7351.5	0.705649	0.595933	1.86565	5648.13
										22.46	9751.88	0.5209	0.408826	2.4008	10489
										23.48	9116.11	0.776967	0.668589	2.2799	6306.3
										24.505	10900.3	0.709195	0.566466	2.72748	8544.86
										25.55	9889.71	0.470452	0.356796	2.42526	11954.9
										26.605	15149.6	0.489859	0.378543	3.71153	17445.3
										27.65	13656.7	0.76425	0.593979	3.35599	10054.8
										28.74	17242.1	0.79047	0.71872	4.36522	11424.7
										29.8	17219.4	0.67519	0.547713	4.4284	14080.7
										30.86	14798.7	0.751397	0.691683	3.64238	10254.9
										Depth (mbsf)	Methane (ppm)	Ethane (ppm)	Propane (ppm)	methane (mM)	C1/(C2+C3)
										M0092D
										0.865	131.642	0.388173	0.302311	0.0298713	190.652
										1.88	308.918	0.684527	0.555396	0.0731332	249.143
										2.89	397.34	0.711158	0.558988	0.0995583	312.83
										3.895	243.437	0.538715	0.439344	0.060137	248.898
										4.905	296.009	0.524463	0.426052	0.0694254	311.42
										5.91	309.553	0.377757	0.279489	0.0755811	470.985
										6.92	472.79	0.354033	0.27412	0.116524	752.667
										7.93	808.495	0.44147	0.351252	0.204406	1019.9
										8.935	1872.8	0.468695	0.362352	0.440883	2253.55
										9.935	2703.5	0.74349	0.66403	0.646476	1920.75
										10.94	4459.51	0.586177	0.437791	1.04653	4355.12
										11.95	5359.4	0.814286	0.664607	1.25815	3623.93
										12.955	6733.69	0.954589	0.831404	1.59003	3770.28
										13.965	8709.27	0.855697	0.691823	2.05532	5627.89
										14.965	7564.01	0.746462	0.602197	1.73195	5608.54
										15.985	10202.7	0.787692	0.619988	2.35297	7247.88
										17.015	13113.9	0.853874	0.646323	3.08503	8741.44
										18.04	12708.2	1.10204	0.885719	2.9582	6393.24
										19.09	8720.27	0.861608	0.700352	2.14867	5582.9
										20.115	15882.1	0.781009	0.605402	4.13936	11455.5
										21.165	16769.6	0.965975	0.812504	3.97051	9429.2
										22.21	15164	0.971728	0.813766	3.68998	8492.91
										23.265	19992.8	1.2183	0.955166	4.74702	9198.59
										24.32	24915.1	1.13362	0.882332	5.84626	12359
										25.345	18030.4	1.14817	0.91953	4.31922	8720.04
										26.41	24313	1.06313	0.777214	6.0446	13211.1
										27.445	26109.8	1.23872	1.0333	6.7268	11491.9
										28.48	21714.3	0.988234	0.726956	5.37731	12660
										29.535	20410.4	1.31416	1.03139	5.05443	8701.75
										30.6	8679.96	1.76425	1.47067	2.22687	2683.21
										31.655	24101.3	2.01523	1.73669	6.3011	6423.72
										32.69	19356.8	1.74238	1.56254	4.99848	5856.97
										33.75	20236.4	2.04609	1.69357	5.12072	5411.29
										34.81	15381.5	1.58123	1.33021	3.7789	5283.12
										35.855	12082.7	1.88888	1.68137	3.17413	3384.26
										Depth (mbsf)	Methane (ppm)	Ethane (ppm)	Propane (ppm)	methane (mM)	C1/(C2+C3)
										M0093B
										0.475	174.533	0.283261	0.213184	0.040987	351.565
										1.475	61.5251	0.188275	0.109774	0.0146255	206.426
										2.485	119.3	0.191084	0.135428	0.0311214	365.376
										3.495	126.971	0.239152	0.177993	0.0332171	304.38
										4.5	131.679	0.245374	0.183405	0.0369146	307.103
										5.505	158.804	0.279709	0.199604	0.0479722	331.315
										6.515	79.7337	0.217122	0.154755	0.020255	214.409
										8.53	512.076	0.52575	0.451381	0.142112	524.061
										9.535	576.897	0.563917	0.51381	0.156442	535.291
										10.535	1183.96	0.895291	0.862009	0.346953	673.738
										11.54	1232.15	0.93251	0.929519	0.397073	661.725
										12.55	1019.92	0.857085	0.796051	0.313025	616.96
										13.56	675.708	0.841662	0.909105	0.202695	385.95
										14.57	755.839	0.585204	0.536131	0.206858	674.053
										15.57	1242.15	0.624026	0.579087	0.391293	1032.45
										16.58	3275.59	0.787842	0.79248	0.978808	2072.74
										17.585	4983.86	0.844152	0.921508	1.46689	2822.66
										18.61	10570.5	0.342642	0.275196	2.63351	17108.8
										19.63	7884.28	0.425914	0.3713	2.14092	9889.79
										20.665	6649.73	0.279099	0.211637	1.66679	13550.5
										21.725	18080.6	0.230411	0.148253	4.33896	47748.4
										22.76	15799.7	0.841256	1.00117	4.19652	8575.47
										23.825	8078.01	0.290736	0.232452	2.02782	15440
										24.9	8140.27	0.41396	0.388232	2.14042	10147.5
										25.955	8380.37	0.254449	0.189646	2.14048	18870.7
										Depth (mbsf)	Methane (ppm)	Ethane (ppm)	Propane (ppm)	methane (mM)	C1/(C2+C3)
										M0095B
										1.265	17.9995	0.0995616	0.0531467	0.00413548	117.868
										2.27	30.0486	0.0929473	0.0710189	0.00728383	183.261
										3.275	42.9215	0.107676	0.0827436	0.0105655	225.405
										4.28	41.8601	0.0882649	0.0696672	0.00979158	265.051
										5.285	83.5411	0.0955246	0.0766809	0.0199958	485.124
										6.29	425.737	0.110397	0.0910445	0.112516	2113.45
										7.29	1390.83	0.116311	0.104177	0.338278	6307.95
										8.305	2803.71	0.122399	0.0906155	0.663827	13162.1
										9.31	4756.8	0.14308	0.0928323	1.14398	20163.4
										10.315	5596.35	0.149921	0.0913849	1.30572	23191.9
										11.325	7391.13	0.166347	0.11458	1.74323	26309.8
										12.335	8054.22	0.19462	0.0935107	1.88814	27953.4
										13.34	10508.7	0.183479	0.12183	2.50903	34420
										14.365	12850.5	0.187647	0.118216	2.9882	42013.8
										15.395	12887.5	0.200089	0.124845	3.06755	39662
										16.445	11286.1	0.188179	0.131645	2.6535	35288.6
										17.495	13278	0.191539	0.109001	3.21013	44180.6
										18.54	19356	0.222271	0.139158	4.52812	53554
										19.61	21836.1	0.258962	0.15984	5.13153	52139.5
										20.66	17704.2	0.225477	0.142964	4.1908	48051.7
										21.705	22266.5	0.247644	0.141568	5.1623	57209.1
										22.775	13630.1	0.196078	0.103702	3.24162	45466.8
										23.855	21312.8	0.227826	0.118914	5.01439	61466.1
										24.9	18440.3	0.199445	0.112953	4.3671	59028.4
										25.91	19054.3	0.182928	0.113545	4.74891	64269.9
										26.92	19212.4	0.207745	0.140534	4.64761	55163.6
										27.95	8191.22	0.156551	0.110326	1.98556	30692.9

## Sheet: Fig. 2
Depth (mbsf)	DOC Concentration (mM)	DOC d13C (‰)	DOC 14C age (yr)	Depth (mbsf)	DOC Concentration (mM)	DOC d13C (‰)	DOC 14C age (yr)	Depth (mbsf)	DOC Concentration (mM)	DOC d13C (‰)	DOC 14C age (yr)		Depth (mbsf)	DOC Concentration (mM)	DOC d13C (‰)	DIC 14C age (yr)	Depth (mbsf)	DOC Concentration (mM)	DOC d13C (‰)	DIC 14C age (yr)	Depth (mbsf)	DOC Concentration (mM)	DOC d13C (‰)	DIC 14C age (yr)
M0081D				M0083D				M0084D					M0081D				M0083D				M0084D
0.175	2.285	-18.62	2100	0.27	1.692	-19.5	2720	0.35	1.721	-19.07	1970		0.175	42.2	-12.59	1730	0.27	18.52	-14.13	2550	1.37	22.45	-14.06	2940
1.175	2.884	-19.46	1840	1.56	1.871	-19.51	3350	1.995	1.876	-20.21	3000		2.185	30.11	-14.43	2040	1.56	27.66	-14.77	3000	3.365	29.6	-14.76	3450
2.185	4.106	-18.7	1910	2.57	2.011	-19.32	3420	3.365	1.531	-18.76	4030		4.695	39.42	-14.83	2320	2.57	30.07	-15.06	3100	6.565	44.75	-15.42	3980
3.19	4.097	-19	2120	3.58	2.22	-19.16	3520	5.515	1.863	-19.04	4410		8.72	43.6	-14.22	2820	3.58	33.84	-15.4	3350	11.67	46.15	-1.05	4590
6.705	4.158	-18.51	2590	5.095	2.337	-18.9	3560	7.575	3.03	-18.35	4210		15.85	42.5	-8.9	3680	5.095	34.95	-15.56	3610	13.69	52.34	3.38	4920
11.735	7.998	-12.91	3060	7.115	2.334	-19.04	3660	9.595	5.751	-16.27	4240		19.985	44.42	-4.85	4360	7.115	26.92	-13.52	3900	19.755	36.23	8.88	5940
15.85	12.138	-12.23	3310	9.135	2.498	-19.5	4640	11.67	6.889	-13.31	4360		26.245	44.56	-3.06	5630	9.135	30.54	-14.45	4620	23.79	35.94	10.15	6710
17.865	11.631	-11.29	3600	10.145	2.462	-15.11	4810	13.69	7.767	-16.06	4610		30.31	49.97	-0.83	6410	20.33	37.41	-5.91	7600	27.825	61.22	10.6	7430
19.985	8.418	-13.87	4050	12.155	2.907	-19.38	5080	15.715	9.859	-21.86	5040		34.345	46.19	-1.29	7240	24.515	43.02	-2.8	8740
22.085	9.284	-15.14	4400	14.185	4.35	-17.85	5010	17.745	7.174	-18.73	5250						28.59	46.14	-0.3	10400
24.17	12.125	-12.46	4740	16.23	4.64	-16.02	5930	19.755	8.188	-16.66	5280						33.055	49.29	0.87	12000
26.245	11.427	-12.15	5100	18.31	5.644	-15.87	5910	21.775	7.26	-17.12	5930
28.29	11.997	-14.36	5440	20.33	7.436	-15.93	6040	23.79	7.443	-18.94	6120
30.31	7.298	-18.01	6170	22.48	5.545	-17.15	6690	25.79	7.033	-18.65	6510
32.32	9.039	-15.76	6480	24.515	5.696	-16.83	7540	27.825	6.847	-18.95	6950
34.345	8.197	-19.59	6930	26.565	4.61	-18.77	8810
				28.59	4.587	-19.23	9770
				30.975	5.476	-19.33	9940
				33.055	6.121	-18.77	10300
				35.075	6.683		11300

## Sheet: Fig. 3
Depth (mbsf)	DOC 14C age (kyr)	DIC 14C age (kyr)	Depth (mbsf)	DOC 14C age (kyr)	DIC 14C age (kyr)	Depth (mbsf)	DOC 14C age (kyr)	DIC 14C age (kyr)
M0081D			M0083D			M0084D
0.175	2.1 ± 0.025	1.73 ± 0.02	0.27	2.72 ± 0.035	2.55 ± 0.02	0.35	1.97 ± 0.04	2.68 ± 0.03*
1.175	1.84 ± 0.02	1.88 ± 0.04*	1.56	3.35 ± 0.035	3 ± 0.02	1.37	2.61 ± 0.08*	2.94 ± 0.03
2.185	1.91 ± 0.02	2.04 ± 0.02	2.57	3.42 ± 0.045	3.1 ± 0.02	1.995	3 ± 0.04	3.10 ± 0.05*
3.19	2.12 ± 0.02	2.15 ± 0.04*	3.58	3.52 ± 0.040	3.35 ± 0.02	3.365	4.03 ± 0.035	3.45 ± 0.02
4.695	2.32 ± 0.04*	2.32 ± 0.02	5.095	3.56 ± 0.035	3.61 ± 0.02	5.515	4.41 ± 0.035	3.81 ± 0.04*
6.705	2.59 ± 0.02	2.57 ± 0.035*	7.115	3.66 ± 0.035	3.9 ± 0.025	6.565	4.31 ± 0.055*	3.98 ± 0.02
8.72	2.78 ± 0.035*	2.82 ± 0.015	9.135	4.64 ± 0.040	4.62 ± 0.025	7.575	4.21 ± 0.025	4.10 ± 0.04*
11.735	3.06 ± 0.015	3.18 ± 0.035*	10.145	4.81 ± 0.040	4.89 ± 0.055*	9.595	4.24 ± 0.03	4.34 ± 0.04*
15.85	3.31 ± 0.02	3.68 ± 0.02	12.155	5.08 ± 0.030	5.42 ± 0.055*	11.67	4.36 ± 0.02	4.59 ± 0.02
17.865	3.6 ± 0.02	4.01 ± 0.04*	14.185	5.01 ± 0.030	5.96 ± 0.055*	13.69	4.61 ± 0.025	4.92 ± 0.025
19.985	4.05 ± 0.02	4.36 ± 0.02	16.23	5.93 ± 0.030	6.51 ± 0.055*	15.715	5.04 ± 0.025	5.26 ± 0.05*
22.085	4.4 ± 0.02	4.79 ± 0.045*	18.31	5.91 ± 0.030	7.06 ± 0.055*	17.745	5.25 ± 0.025	5.60 ± 0.05*
24.17	4.74 ± 0.02	5.21 ± 0.045*	20.33	6.04 ± 0.030	7.6 ± 0.03	19.755	5.28 ± 0.025	5.94 ± 0.025
26.245	5.1 ± 0.02	5.63 ± 0.025	22.48	6.69 ± 0.030	8.19 ± 0.06*	21.775	5.93 ± 0.03	6.33 ± 0.05*
28.29	5.44 ± 0.02	6.02 ± 0.05*	24.515	7.54 ± 0.035	8.74 ± 0.03	23.79	6.12 ± 0.03	6.71 ± 0.025
30.31	6.17 ± 0.025	6.41 ± 0.025	26.565	8.81 ± 0.045	9.58 ± 0.07*	25.79	6.51 ± 0.035	7.07 ± 0.055*
32.32	6.48 ± 0.025	6.82 ± 0.055*	28.59	9.77 ± 0.05	10.4 ± 0.04	27.825	6.95 ± 0.035	7.43 ± 0.03
34.345	6.93 ± 0.03	7.24 ± 0.03	30.975	9.94 ± 0.05	11.25 ± 0.095*
			33.055	10.3 ± 0.055	12 ± 0.055
			35.075	11.3 ± 0.07	12.72 ± 0.055*
Linearly extrapolated values used in Fig. 3 are marked by *.
